# Supplementary material
Source: publisher site journal article supplement (https://www.spandidos-publications.com/8372/downloadSupplementary)
Supplement: Supplementary file 1 [file downloadSupplementary]

## Sheet: Sheet 1
Table SII. Differential genes of LUSC.
Gene	Gene ID	Median (tumor)	Median (normal)	Log2(fold change)	Adjusted P-value
KRT6A	ENSG00000205420.10	2144.39	1.495	9.748	2.78e-256
KRT5	ENSG00000186081.11	2733.81	3.565	9.227	1.43e-232
AC055736.3	ENSG00000281194.1	326.932	0	8.357	5.44e-67
KRT17	ENSG00000128422.15	1767.26	4.76	8.262	5.49e-233
RP11-40C6.2	ENSG00000219928.2	727.27	1.89	7.977	5.02e-242
KRT16	ENSG00000186832.8	235.51	0.22	7.599	9.08e-233
S100A2	ENSG00000196754.10	1147.44	5.45	7.476	5.81e-221
RP11-116G8.5	ENSG00000256462.1	163.794	0.04	7.308	2.29e-198
KRT6B	ENSG00000185479.5	137.982	0.125	6.949	3.31e-207
CALML3	ENSG00000178363.4	120.316	0.07	6.825	5.3e-199
SPRR1B	ENSG00000169469.8	153.846	0.415	6.774	2.35e-151
GPX2	ENSG00000176153.11	237.551	1.41	6.629	1.59e-162
RP5-940J5.9	ENSG00000269968.1	86.103	0	6.445	3.56e-107
TP63	ENSG00000073282.12	123.635	0.51	6.367	1.47e-247
MIR205HG	ENSG00000230937.9	129.359	0.645	6.308	8.32e-235
AC055736.1	ENSG00000280827.1	70.663	0	6.163	9.92e-57
SERPINB5	ENSG00000206075.13	74.32	0.14	6.046	5.07e-294
CLCA2	ENSG00000137975.7	69.49	0.12	5.976	6.83e-171
TMPRSS4	ENSG00000137648.16	126.622	1.05	5.96	7.45e-227
DSG3	ENSG00000134757.4	61.479	0.04	5.909	2.9e-219
AKR1B10	ENSG00000198074.9	68.23	0.2	5.85	1.63e-134
SPRR2A	ENSG00000241794.1	76.034	0.41	5.772	2.49e-118
UGT1A6	ENSG00000167165.18	61.791	0.17	5.746	9.31e-160
DAPL1	ENSG00000163331.10	74.519	0.445	5.708	9.85e-156
SOX2	ENSG00000181449.3	68.329	0.355	5.677	2.88e-179
KRT14	ENSG00000186847.5	121.111	1.405	5.666	4.62e-115
GJB2	ENSG00000165474.5	69.18	0.42	5.627	5.74e-224
TRIM29	ENSG00000137699.16	300.037	5.125	5.619	4.12e-229
PTHLH	ENSG00000087494.15	87.9	0.94	5.518	6.48e-185
DSC3	ENSG00000134762.16	50.485	0.13	5.51	3.3e-224
SPRR1A	ENSG00000169474.4	60.108	0.36	5.49	2.92e-114
KRT15	ENSG00000171346.13	356.262	7.615	5.374	3.19e-155
PKP1	ENSG00000081277.11	169.806	3.145	5.365	4.82e-167
COL17A1	ENSG00000065618.16	64.01	0.58	5.363	7.69e-173
SLC2A1	ENSG00000117394.19	547.114	12.43	5.351	4.16e-309
GPR87	ENSG00000138271.5	43.075	0.095	5.331	1.31e-272
SPRR2D	ENSG00000163216.6	48.435	0.26	5.294	1.39e-118
SPP1	ENSG00000118785.13	385.142	9.414	5.212	6.54e-178
IGHGP	ENSG00000253755.1	79.928	1.4	5.076	4.21e-139
MMP12	ENSG00000262406.2	38.175	0.2	5.029	5.55e-236
GJB6	ENSG00000121742.15	36.141	0.14	5.026	5.04e-157
PITX1	ENSG00000069011.15	35.22	0.19	4.928	8.9e-252
LGALS7B	ENSG00000178934.4	77.675	1.63	4.903	3.19e-127
LYPD3	ENSG00000124466.8	76.317	1.62	4.883	3e-222
MMP11	ENSG00000099953.9	52.461	0.88	4.83	1.89e-235
ADH7	ENSG00000196344.11	29.494	0.1	4.793	3.68e-94
MMP1	ENSG00000196611.4	57.745	1.22	4.726	1.15e-133
SERPINB3	ENSG00000057149.14	30.054	0.22	4.67	1.52e-101
TNS4	ENSG00000131746.12	34.536	0.42	4.645	9.4e-225
PRAME	ENSG00000185686.17	26.269	0.09	4.645	1.77e-166
AP003391.1	ENSG00000281272.1	23.413	0	4.61	6.79e-48
GJB5	ENSG00000189280.3	28.17	0.215	4.585	5.27e-245
UBE2C	ENSG00000175063.16	102.344	3.395	4.555	0
CA9	ENSG00000107159.12	26.074	0.16	4.545	5.49e-149
PVRL1	ENSG00000110400.10	101.458	3.61	4.474	1.49e-278
DSP	ENSG00000096696.13	129.552	5	4.444	4.96e-303
CDH3	ENSG00000062038.13	98.519	3.635	4.424	6.68e-229
KRT13	ENSG00000171401.14	134.554	5.575	4.366	5.48e-71
RHOV	ENSG00000104140.6	32.755	0.64	4.363	4.65e-216
CLDN1	ENSG00000163347.5	132.724	5.54	4.354	9.79e-162
IGKV2D-28	ENSG00000242534.2	63.346	2.17	4.343	6.91e-86
MYBL2	ENSG00000101057.15	41.59	1.1	4.342	0
SPRR3	ENSG00000163209.14	40.785	1.07	4.335	4.95e-75
GBP6	ENSG00000183347.14	20.525	0.11	4.277	4.03e-154
HSPB1P1	ENSG00000236060.2	27.46	0.485	4.26	2.54e-220
CDC20	ENSG00000117399.13	53.43	1.845	4.258	2.68e-316
ALG1L	ENSG00000189366.9	28.3	0.54	4.25	4.03e-251
KRT6C	ENSG00000170465.9	18.27	0.04	4.212	3.03e-131
GJB3	ENSG00000188910.7	25.685	0.44	4.212	2.65e-237
TPX2	ENSG00000088325.15	39.545	1.215	4.194	0
BIRC5	ENSG00000089685.14	40.661	1.305	4.176	1.33e-300
S100A7	ENSG00000143556.8	21.35	0.24	4.172	1.77e-104
SERPINB13	ENSG00000197641.11	17.668	0.04	4.166	7.2e-128
BMP7	ENSG00000101144.12	46.011	1.66	4.143	5.78e-155
LY6D	ENSG00000167656.4	23.38	0.38	4.143	1.41e-99
NTS	ENSG00000133636.10	25.595	0.54	4.11	4.96e-67
CST1	ENSG00000170373.8	16.225	0	4.106	2.65e-131
IGHG4	ENSG00000211892.3	348.834	19.355	4.103	9.68e-87
FAT2	ENSG00000086570.12	18.885	0.19	4.063	8.35e-181
AC098973.2	ENSG00000225548.5	15.625	0	4.055	4.49e-171
CDKN2A	ENSG00000147889.16	49.104	2.12	4.005	2.7e-70
AKR1C2	ENSG00000151632.16	369.325	22.255	3.993	2.2e-73
TFAP2A	ENSG00000137203.10	21.125	0.39	3.993	7.3e-303
LINC00958	ENSG00000251381.6	16.614	0.11	3.988	3.35e-165
PERP	ENSG00000112378.11	351.224	21.75	3.953	1.7e-300
RP5-890E16.4	ENSG00000266341.1	14.485	0	3.953	2.55e-106
PI3	ENSG00000124102.4	131.593	7.62	3.943	1.46e-61
CTSV	ENSG00000136943.10	22.579	0.54	3.937	2.52e-229
CENPF	ENSG00000117724.12	34.735	1.34	3.933	1.66e-275
FGFBP1	ENSG00000137440.4	48.819	2.32	3.908	7.15e-111
KIAA0101	ENSG00000166803.10	53.256	2.62	3.906	2.69e-256
CRABP2	ENSG00000143320.8	74.325	4.03	3.905	1.31e-159
CCNB2	ENSG00000157456.7	35.52	1.47	3.886	0
FOXM1	ENSG00000111206.12	41.879	1.9	3.886	1.22e-273
CKMT1B	ENSG00000237289.9	26.124	0.845	3.878	2.89e-194
COL10A1	ENSG00000123500.9	18.82	0.36	3.865	1.41e-148
TOP2A	ENSG00000131747.14	42.223	1.98	3.858	3.85e-257
CXCL13	ENSG00000156234.7	19.619	0.435	3.845	1.74e-123
RRM2	ENSG00000171848.13	46.515	2.32	3.839	1.41e-254
ALDH3A1	ENSG00000108602.17	53.434	2.825	3.831	2.96e-65
NXPH4	ENSG00000182379.9	16.72	0.25	3.825	1.01e-201
RP3-523K23.2	ENSG00000261116.1	13.865	0.05	3.823	4.15e-279
ALDH3B2	ENSG00000132746.14	18.775	0.41	3.81	2.13e-215
UBE2SP2	ENSG00000224126.2	17.085	0.3	3.798	1.01e-315
CCNB1	ENSG00000134057.14	65.94	3.84	3.79	1.09e-316
CKMT1A	ENSG00000223572.9	23.779	0.83	3.759	1.1e-180
SFN	ENSG00000175793.11	663.291	48.085	3.758	5.02e-167
LINC00511	ENSG00000227036.6	32.82	1.5	3.758	1.57e-270
CASC9	ENSG00000249395.2	12.455	0	3.75	3.51e-230
TROAP	ENSG00000135451.12	34.779	1.685	3.736	3.03e-267
WDR72	ENSG00000166415.14	15.145	0.23	3.714	7.86e-235
IGSF9	ENSG00000085552.16	19.2	0.555	3.699	2.69e-233
MMP10	ENSG00000166670.9	14.434	0.19	3.697	1.04e-85
KCNMB2-AS1	ENSG00000237978.5	11.965	0	3.697	2.66e-240
FERMT1	ENSG00000101311.15	20.78	0.69	3.688	2.8e-271
FAM83A	ENSG00000147689.16	13.545	0.18	3.624	1.28e-119
SLC6A8	ENSG00000130821.15	132.922	9.94	3.614	5.69e-190
PSAT1	ENSG00000135069.13	38.269	2.215	3.611	6.3e-181
RHCG	ENSG00000140519.12	15.124	0.33	3.6	5.36e-97
TK1	ENSG00000167900.11	92.196	6.79	3.581	2.74e-261
RP11-544M22.13	ENSG00000270149.5	14.29	0.28	3.578	1.36e-111
NEK2	ENSG00000117650.12	15.995	0.43	3.571	0
GRHL3	ENSG00000158055.15	12.145	0.11	3.566	1.04e-189
CERS3	ENSG00000154227.13	11.755	0.09	3.549	1.58e-152
EPN3	ENSG00000049283.17	16.125	0.48	3.532	9.48e-257
IRF6	ENSG00000117595.10	86.401	6.56	3.531	1.61e-245
CAPNS2	ENSG00000256812.1	12.35	0.16	3.525	1.03e-125
TRIP13	ENSG00000071539.13	23.255	1.115	3.52	9.28e-290
CEP55	ENSG00000138180.15	18.56	0.715	3.512	7.69e-306
FAM83F	ENSG00000133477.16	11.81	0.15	3.478	7.94e-234
CDKN3	ENSG00000100526.19	29.99	1.79	3.473	1.5e-274
DSG2	ENSG00000046604.12	65.032	4.955	3.471	2.39e-248
CENPA	ENSG00000115163.14	16.76	0.625	3.45	0
FOXE1	ENSG00000178919.8	10.15	0.02	3.45	1.43e-147
MTND4P12	ENSG00000247627.2	13.175	0.3	3.447	3.6e-45
HAS3	ENSG00000103044.10	44.769	3.255	3.427	1.21e-103
ZWINT	ENSG00000122952.16	39.789	2.815	3.418	1.25e-274
NCAPH	ENSG00000121152.9	19.67	0.94	3.413	1.74e-304
CDC45	ENSG00000093009.9	20.29	1.01	3.405	2.31e-264
SPRR2E	ENSG00000203785.8	12.54	0.28	3.403	1.57e-75
UBE2T	ENSG00000077152.9	40.83	2.96	3.401	3.87e-294
IGKV1D-33	ENSG00000239975.2	9.545	0	3.398	1.92e-85
LY6K	ENSG00000160886.13	17.655	0.775	3.394	4.17e-145
CDCA5	ENSG00000146670.9	23.67	1.355	3.389	1.47e-285
PTPRZ1	ENSG00000106278.11	26.985	1.675	3.387	2.51e-92
ADAM23	ENSG00000114948.12	19.751	1.02	3.361	1.17e-86
CDK1	ENSG00000170312.15	43.38	3.33	3.358	1.34e-276
SOX15	ENSG00000129194.7	22.634	1.305	3.358	1.09e-128
ANLN	ENSG00000011426.10	19.95	1.045	3.357	8.46e-284
CTHRC1	ENSG00000164932.12	63.41	5.295	3.355	3.11e-167
CBLC	ENSG00000142273.10	23.05	1.37	3.343	1.71e-237
AURKB	ENSG00000178999.12	32.225	2.285	3.338	6.48e-244
PPP2R2C	ENSG00000074211.13	10.32	0.12	3.337	2.11e-152
MAD2L1	ENSG00000164109.13	27.826	1.87	3.328	1.58e-300
CDC6	ENSG00000094804.9	17.205	0.835	3.31	5.23e-258
RAET1L	ENSG00000155918.7	8.865	0	3.302	2.39e-139
MCM2	ENSG00000073111.13	46.686	3.86	3.295	2.04e-281
LAD1	ENSG00000159166.13	131.753	12.585	3.289	3.91e-202
CXCL14	ENSG00000145824.12	42.808	3.525	3.275	1.26e-92
PNCK	ENSG00000130822.15	15.655	0.725	3.271	3.82e-123
ITGB4	ENSG00000132470.13	198.954	19.77	3.267	4e-185
LGALS7	ENSG00000205076.4	10.595	0.215	3.254	8.25e-97
B4GALNT4	ENSG00000182272.11	15.18	0.71	3.242	2.8e-161
MELK	ENSG00000165304.7	14.39	0.63	3.239	9.73e-271
PPAP2C	ENSG00000141934.9	73.409	6.905	3.235	2.68e-188
MAGEA4	ENSG00000147381.11	8.38	0	3.23	1.74e-76
COL11A1	ENSG00000060718.18	10.435	0.225	3.223	1.2e-134
CNFN	ENSG00000105427.9	17.255	0.96	3.219	8.98e-160
FAM83B	ENSG00000168143.8	8.67	0.04	3.217	1.96e-242
PROM2	ENSG00000155066.15	30.72	2.42	3.213	2.3e-156
IGHG1	ENSG00000211896.6	6227.34	679.956	3.193	3.12e-56
PTTG1	ENSG00000164611.12	82.615	8.155	3.191	4.01e-288
EIF5AP4	ENSG00000234743.1	9.965	0.22	3.168	1.98e-262
KIF2C	ENSG00000142945.12	17.16	1.03	3.161	7.9e-290
NTRK2	ENSG00000148053.15	30.316	2.504	3.16	1.04e-52
BNC1	ENSG00000169594.12	8.65	0.08	3.159	1.49e-138
UCHL1	ENSG00000154277.12	113.692	11.875	3.155	3.29e-69
MCM4	ENSG00000104738.16	70.479	7.065	3.148	2.35e-264
ASF1B	ENSG00000105011.8	21.87	1.595	3.14	6.55e-252
DLGAP5	ENSG00000126787.12	11.235	0.39	3.138	9.8e-294
COL7A1	ENSG00000114270.15	61.364	6.135	3.128	2.6e-127
DLX5	ENSG00000105880.4	9.245	0.175	3.124	1.04e-153
RPL39L	ENSG00000163923.9	57.881	5.755	3.124	7.9e-192
NUF2	ENSG00000143228.12	14.825	0.82	3.12	3.24e-260
APOBEC3B	ENSG00000179750.15	21.595	1.605	3.117	3.01e-190
BBOX1-AS1	ENSG00000254560.5	7.575	0	3.1	1.16e-213
CSTA	ENSG00000121552.3	240.142	27.125	3.1	1.83e-108
IGFBP2	ENSG00000115457.9	597.335	68.945	3.097	9.51e-102
UHRF1	ENSG00000276043.4	14.295	0.795	3.091	1.26e-249
KIF20A	ENSG00000112984.11	13.255	0.685	3.081	2.43e-263
PBK	ENSG00000168078.9	10.68	0.38	3.081	4.1e-245
CKS1BP3	ENSG00000268942.2	7.445	0	3.078	1.35e-110
PLK1	ENSG00000166851.14	28.025	2.445	3.075	5.85e-281
RMI2	ENSG00000175643.8	22.425	1.785	3.072	6.92e-250
CDCA8	ENSG00000134690.10	16.959	1.14	3.069	4.17e-290
C10orf99	ENSG00000188373.4	7.345	0	3.061	5.7e-98
CENPW	ENSG00000203760.8	46.216	4.665	3.059	3.03e-267
CDCA3	ENSG00000111665.11	29.414	2.665	3.053	1.49e-242
IGHV1-69-2	ENSG00000280411.1	117.644	13.33	3.05	2.63e-54
TTK	ENSG00000112742.9	10.62	0.41	3.043	3.01e-289
KIFC1	ENSG00000237649.7	21.49	1.755	3.029	3.18e-258
VSNL1	ENSG00000163032.11	24.025	2.08	3.022	3.47e-130
IGHG2	ENSG00000211893.3	929.717	113.996	3.017	1.34e-50
AP000349.2	ENSG00000280178.1	7.57	0.06	3.015	4.83e-148
PFN2	ENSG00000070087.13	165.598	19.61	3.015	8.78e-162
CYP2S1	ENSG00000167600.13	51.918	5.56	3.012	1.98e-107
IGF2BP3	ENSG00000136231.13	12.485	0.675	3.009	1.58e-154
AURKA	ENSG00000087586.17	20.559	1.685	3.005	3.38e-297
CDCA7	ENSG00000144354.13	14.845	0.975	3.004	5.99e-236
KIF4A	ENSG00000090889.11	9.43	0.3	3.004	1.19e-300
MKI67	ENSG00000148773.12	17.405	1.305	2.997	2.43e-218
GALNT14	ENSG00000158089.14	17.86	1.365	2.995	1.11e-127
GINS1	ENSG00000101003.9	10.46	0.44	2.992	6.33e-299
SUSD4	ENSG00000143502.14	21.41	1.82	2.99	6.58e-128
FAM64A	ENSG00000129195.15	10.49	0.45	2.986	1.56e-247
TUBB3	ENSG00000258947.6	24.34	2.205	2.983	5.97e-117
AK4	ENSG00000162433.14	22.465	1.98	2.977	1.31e-195
RAD51	ENSG00000051180.16	13.745	0.88	2.971	2.86e-278
IVL	ENSG00000163207.6	7.78	0.12	2.971	1.14e-98
LINC01296	ENSG00000244306.9	12.485	0.72	2.971	3.31e-146
SERPINB4	ENSG00000206073.10	7.14	0.04	2.968	9.43e-88
SNRPGP2	ENSG00000264350.1	42.44	4.59	2.958	2.55e-212
RP1-241P17.4	ENSG00000228532.4	31.9	3.245	2.954	1.06e-155
ARNTL2	ENSG00000029153.14	19.74	1.7	2.941	1.76e-206
SLC7A5	ENSG00000103257.8	76.709	9.145	2.937	1.56e-163
NUSAP1	ENSG00000137804.12	33.825	3.56	2.933	2.42e-234
IGKV3-15	ENSG00000244437.1	339.966	44.01	2.921	8.13e-50
CDT1	ENSG00000167513.8	15.275	1.16	2.914	2.29e-239
ECE2	ENSG00000145194.17	22.57	2.175	2.892	9.55e-230
HOXA10	ENSG00000253293.4	7.665	0.17	2.889	1.01e-196
DSC2	ENSG00000134755.14	30.985	3.34	2.882	9.85e-188
TMEM40	ENSG00000088726.15	19.785	1.82	2.882	3.63e-128
PVRL4	ENSG00000143217.8	35.31	3.925	2.882	3.45e-182
CA12	ENSG00000074410.13	24.245	2.43	2.88	1.31e-96
GINS2	ENSG00000131153.8	10.705	0.59	2.88	7.4e-267
IGKV3D-15	ENSG00000224041.3	9.95	0.495	2.873	1.5e-70
SAPCD2	ENSG00000186193.8	9.345	0.42	2.865	3.42e-223
UBD	ENSG00000213886.3	37.676	4.31	2.865	1.88e-91
FGF11	ENSG00000161958.10	13.635	1.01	2.864	4e-177
SDC1	ENSG00000115884.10	382.667	51.823	2.861	2.09e-174
IGHV1-69	ENSG00000211973.2	24.94	2.585	2.855	6.89e-47
GREM1	ENSG00000166923.10	10.18	0.55	2.851	7.65e-100
KIF11	ENSG00000138160.5	11.32	0.71	2.849	1.75e-291
CD24	ENSG00000272398.5	194.273	26.178	2.845	3.68e-121
WNT7B	ENSG00000188064.9	21.3	2.11	2.842	7.87e-147
CENPM	ENSG00000100162.14	26.139	2.79	2.84	1.02e-196
UPK1B	ENSG00000114638.7	6.664	0.075	2.834	1.8e-60
ANXA8	ENSG00000265190.6	71.55	9.2	2.83	2.63e-69
ARTN	ENSG00000117407.16	14.55	1.195	2.825	4.32e-111
IGHV4-31	ENSG00000231475.3	25.985	2.815	2.822	7.55e-50
SOX21	ENSG00000125285.5	6.265	0.04	2.804	5.36e-121
C16orf74	ENSG00000154102.10	21.25	2.19	2.802	1.23e-159
LINC01133	ENSG00000224259.5	8.975	0.43	2.802	7.17e-81
PKMYT1	ENSG00000127564.16	21.88	2.315	2.787	1.87e-207
IGHV1-24	ENSG00000211950.2	41.73	5.2	2.785	2.99e-52
BUB1	ENSG00000169679.14	13.67	1.135	2.781	5.43e-263
NDC80	ENSG00000080986.12	12.19	0.92	2.78	1.35e-239
LINC00668	ENSG00000265933.5	6.005	0.02	2.78	2.82e-109
HMGB3	ENSG00000029993.14	106.049	14.63	2.776	5.96e-221
PRR11	ENSG00000068489.12	12.155	0.93	2.769	2.65e-264
DTL	ENSG00000143476.17	12.63	1.01	2.762	1.27e-199
FAM83H-AS1	ENSG00000203499.10	31.745	3.835	2.76	1.33e-182
IGHV3-21	ENSG00000211947.2	122.627	17.255	2.76	1.71e-43
RP11-367G18.1	ENSG00000230943.1	6.725	0.14	2.76	9.24e-145
UBE2S	ENSG00000108106.13	103.741	14.475	2.759	8.58e-268
HMGA1	ENSG00000137309.19	273.708	39.789	2.752	1.09e-233
HNRNPCP2	ENSG00000204253.4	18.22	1.855	2.751	7.03e-277
GYLTL1B	ENSG00000165905.16	32.895	4.05	2.747	4.62e-186
ESPN	ENSG00000187017.14	14.54	1.315	2.747	5.6e-118
OIP5	ENSG00000104147.8	8.39	0.4	2.746	1.41e-281
GSTA1	ENSG00000243955.5	23.833	2.705	2.745	2.91e-32
RAD51AP1	ENSG00000111247.14	15.445	1.455	2.744	1.45e-247
EXO1	ENSG00000174371.16	8.315	0.39	2.744	3.41e-281
CCNA2	ENSG00000145386.9	17.135	1.715	2.74	1.27e-241
RN7SL1	ENSG00000276168.1	962.437	143.513	2.737	9.01e-102
HMGA2	ENSG00000149948.13	6.185	0.08	2.734	2.69e-119
TMPRSS11E	ENSG00000087128.9	5.835	0.03	2.73	1.44e-114
IGHV5-51	ENSG00000211966.2	124.823	17.974	2.729	7.42e-45
TPD52L1	ENSG00000111907.20	94.189	13.395	2.725	3.03e-166
SPC25	ENSG00000152253.8	9.955	0.69	2.696	6.14e-248
GSDMC	ENSG00000147697.8	8.154	0.42	2.689	3.29e-129
EYA2	ENSG00000064655.18	17.535	1.88	2.686	2.57e-102
IGHV1-18	ENSG00000211945.2	99.86	14.745	2.679	1.77e-47
BUB1B	ENSG00000156970.12	11.765	1.01	2.667	5.22e-222
TYMS	ENSG00000176890.15	48.44	6.82	2.66	3.72e-179
IGLV3-25	ENSG00000211659.2	179.115	27.606	2.655	3.7e-42
NCAPG	ENSG00000109805.9	9.065	0.6	2.653	5.59e-258
CHEK1	ENSG00000149554.12	14.405	1.46	2.647	8.95e-271
SLC9A3R1	ENSG00000109062.9	173.952	26.95	2.646	4.79e-163
HJURP	ENSG00000123485.11	11.51	1	2.645	3.83e-230
IGLV3-21	ENSG00000211662.2	127.698	19.7	2.636	8.94e-43
AC005255.3	ENSG00000256210.3	5.21	0	2.635	3.12e-125
PLEKHG6	ENSG00000008323.15	14.655	1.525	2.632	1.22e-174
SRP9P1	ENSG00000180581.7	48.569	7	2.631	9.8e-83
EGLN3	ENSG00000129521.13	49.345	7.135	2.63	6.46e-106
TPD52	ENSG00000076554.15	89.691	13.655	2.63	3.08e-211
RP11-73M18.2	ENSG00000256500.5	5.18	0	2.628	1.06e-117
RP11-44F21.5	ENSG00000260265.1	7.195	0.33	2.623	9.21e-164
AHNAK2	ENSG00000185567.6	34.71	4.805	2.621	3.67e-87
IGKV3-11	ENSG00000241351.2	1039.95	168.189	2.621	1.51e-44
VTCN1	ENSG00000134258.16	5.57	0.07	2.618	1.82e-102
LYPD6B	ENSG00000150556.16	12.215	1.16	2.613	7.16e-109
ORC6	ENSG00000091651.8	13.29	1.34	2.61	7.86e-238
TFAP2C	ENSG00000087510.6	14.46	1.535	2.608	1.01e-217
IGKV1-33	ENSG00000242076.2	276.416	44.569	2.606	1.55e-40
TUBA1C	ENSG00000167553.14	658.093	107.358	2.605	4.94e-225
IGKV1-5	ENSG00000243466.1	267.074	43.06	2.605	2.18e-40
KIF18B	ENSG00000186185.13	8.42	0.55	2.603	2.67e-190
FXYD3	ENSG00000089356.16	867.096	142.029	2.602	9.61e-97
GGH	ENSG00000137563.11	48.98	7.25	2.599	1.85e-219
AKR1C1	ENSG00000187134.12	229.881	37.37	2.589	9.11e-45
PYCR1	ENSG00000183010.16	57.265	8.685	2.589	1.82e-134
RFC4	ENSG00000163918.10	57.986	8.81	2.588	1.1e-216
MDK	ENSG00000110492.15	283.253	46.325	2.586	5.3e-147
FSCN1	ENSG00000075618.17	170.212	27.565	2.583	7.93e-155
IGHG3	ENSG00000211897.7	806.091	133.759	2.582	2.61e-44
IGKV3-20	ENSG00000239951.1	797.587	132.329	2.582	9.46e-41
KLK8	ENSG00000129455.15	5.64	0.11	2.581	2.52e-74
A2ML1	ENSG00000166535.19	5.61	0.11	2.574	4.72e-96
PLEK2	ENSG00000100558.8	13.765	1.48	2.574	7.75e-140
IGKV4-1	ENSG00000211598.2	256.461	42.439	2.567	2e-41
C12orf56	ENSG00000185306.12	5.095	0.03	2.565	2.27e-192
ASPM	ENSG00000066279.16	7.13	0.375	2.564	6.3e-246
CENPN	ENSG00000166451.13	28.68	4.02	2.564	4.42e-224
BIK	ENSG00000100290.2	13.63	1.475	2.563	2.28e-179
ECT2	ENSG00000114346.13	35.465	5.175	2.562	9.61e-213
IGKV1D-39	ENSG00000251546.1	597.708	100.593	2.559	2.17e-38
TMPRSS11D	ENSG00000153802.11	4.975	0.02	2.55	7.77e-88
PAX9	ENSG00000198807.12	6.48	0.28	2.547	3.09e-129
SPTBN2	ENSG00000173898.11	20.589	2.7	2.545	1.36e-189
PRC1	ENSG00000198901.13	56.275	8.835	2.542	5.52e-204
IGLV3-19	ENSG00000211663.2	169.876	28.334	2.542	3.2e-36
DUXAP8	ENSG00000206195.10	12.095	1.25	2.541	8.38e-122
KCTD1	ENSG00000134504.12	32.785	4.805	2.541	3.06e-168
KIF23	ENSG00000137807.13	18.035	2.275	2.539	2.87e-223
DEPDC1B	ENSG00000035499.12	6.66	0.32	2.537	2.95e-266
MAGED4	ENSG00000154545.16	8.54	0.645	2.536	4.29e-112
EFNA3	ENSG00000143590.13	10.96	1.065	2.534	5.58e-231
SNRPEP2	ENSG00000256968.1	17.625	2.23	2.528	1.27e-236
KPNA2	ENSG00000182481.8	109.432	18.225	2.522	6.13e-240
FAM83D	ENSG00000101447.13	25.615	3.645	2.519	2.04e-154
CENPU	ENSG00000151725.11	19.005	2.51	2.511	2.81e-208
KLC3	ENSG00000104892.16	11.025	1.11	2.511	5.93e-170
BCL11A	ENSG00000119866.20	13.85	1.62	2.503	7.99e-158
MMP7	ENSG00000137673.8	36.724	5.67	2.5	7.85e-82
ZNF750	ENSG00000141579.6	13.43	1.575	2.486	1.13e-119
SLC16A1	ENSG00000155380.11	29.504	4.45	2.485	5.39e-166
GTSE1	ENSG00000075218.18	9.09	0.805	2.483	2.06e-213
HMMR	ENSG00000072571.19	7.825	0.585	2.477	7.53e-234
CKS1B	ENSG00000173207.12	175.392	31.01	2.462	1.32e-253
KRT19	ENSG00000171345.13	1407.19	254.513	2.462	1.01e-85
WNK2	ENSG00000165238.16	11.64	1.295	2.461	1.78e-101
IGFBP3	ENSG00000146674.14	186.553	33.164	2.457	8.94e-99
SIX1	ENSG00000126778.8	7.495	0.55	2.454	1.59e-143
IGKC	ENSG00000211592.6	11266.9	2056.25	2.453	3.47e-40
CKAP2L	ENSG00000169607.12	6.44	0.36	2.452	1.92e-260
SKA1	ENSG00000154839.9	5.845	0.255	2.447	2.99e-252
F12	ENSG00000131187.9	8.775	0.8	2.441	7.43e-186
HS6ST2	ENSG00000171004.17	5.625	0.22	2.441	9.14e-142
FBXO27	ENSG00000161243.8	18.795	2.655	2.437	5.6e-134
DLK2	ENSG00000171462.14	7.115	0.5	2.436	3.78e-142
OTX1	ENSG00000115507.9	5.005	0.11	2.436	6.99e-173
HN1	ENSG00000189159.15	306.617	56.036	2.431	4.16e-248
RP11-649E7.5	ENSG00000258377.1	6.73	0.435	2.429	1.3e-54
IGLV2-23	ENSG00000211660.3	159.586	28.844	2.428	6.26e-36
RP11-70C1.3	ENSG00000235288.3	6.235	0.345	2.427	5.2e-23
CDCA4	ENSG00000170779.10	24.935	3.84	2.422	3.31e-265
PIGY	ENSG00000255072.1	19.339	2.81	2.416	1.93e-62
IGLV3-1	ENSG00000211673.2	180.117	33.145	2.407	1.5e-35
IGHV3-43	ENSG00000232216.1	14.245	1.875	2.407	6.13e-46
HMGN1P37	ENSG00000229237.2	4.3	0	2.406	2.59e-205
DEPDC1	ENSG00000024526.16	5.14	0.16	2.404	1.94e-267
FANCI	ENSG00000140525.17	23.075	3.575	2.396	7.94e-205
THOC3	ENSG00000051596.9	73.185	13.105	2.395	4.77e-216
RP11-758M4.4	ENSG00000253706.5	4.26	0	2.395	4.93e-108
PODXL2	ENSG00000114631.10	15.845	2.205	2.394	6.55e-133
IGHV4-34	ENSG00000211956.2	59.659	10.539	2.394	1.59e-35
LAMC2	ENSG00000058085.14	81.684	14.805	2.387	1.76e-85
EPHB3	ENSG00000182580.2	25.6	4.09	2.386	1.03e-129
IGKV1-17	ENSG00000240382.3	91.932	16.824	2.382	3.2e-33
AL158801.1	ENSG00000279392.1	7.18	0.57	2.381	5.08e-198
NME1	ENSG00000239672.7	167.526	31.4	2.379	2.7e-172
JUP	ENSG00000173801.16	357.462	68.26	2.372	1.34e-184
RAD54L	ENSG00000085999.11	8.96	0.93	2.368	1.04e-209
PPIAP22	ENSG00000198618.5	340.662	65.323	2.365	3.43e-211
IGLC3	ENSG00000211679.2	1616.38	314.18	2.359	3.05e-33
RP11-161H23.5	ENSG00000258232.2	235.2	45.405	2.348	1.65e-196
WDR66	ENSG00000158023.9	15.995	2.345	2.345	5.31e-78
FEN1	ENSG00000168496.3	31.184	5.345	2.343	2.73e-218
YWHAZP5	ENSG00000213260.3	5.64	0.31	2.342	5.79e-218
C15orf48	ENSG00000166920.10	31.62	5.45	2.338	1.75e-87
IGLV1-40	ENSG00000211653.2	274.383	53.461	2.338	6.57e-31
MND1	ENSG00000121211.7	7.06	0.595	2.337	3.21e-220
LAMB3	ENSG00000196878.12	148.348	28.55	2.337	1.43e-101
SIX2	ENSG00000170577.7	4.795	0.15	2.333	8.27e-104
IGKV1-8	ENSG00000240671.2	59.663	11.105	2.325	6.69e-37
PAICS	ENSG00000128050.8	68.329	12.845	2.324	6.43e-206
PMAIP1	ENSG00000141682.11	19.325	3.06	2.324	9.79e-152
SPC24	ENSG00000161888.11	9.065	1.01	2.324	3.92e-190
EDARADD	ENSG00000186197.12	5.545	0.31	2.321	8.87e-145
IGKV1-9	ENSG00000241755.1	101.673	19.545	2.321	7.33e-34
OVOL1	ENSG00000172818.9	5.69	0.34	2.32	3.16e-156
IGHV3-23	ENSG00000211949.3	192.704	37.784	2.32	1.19e-33
SKA3	ENSG00000165480.15	5.56	0.32	2.313	6.82e-258
CENPH	ENSG00000153044.9	16.555	2.55	2.306	5.03e-240
ZP3	ENSG00000188372.14	13.88	2.01	2.306	8.93e-137
DLEU2_6	ENSG00000275559.1	3.944	0	2.306	2.03e-32
KIAA1524	ENSG00000163507.13	8.705	0.965	2.304	9.48e-235
ETV4	ENSG00000175832.12	15.435	2.335	2.301	5.44e-116
PAFAH1B3	ENSG00000079462.7	55.506	10.485	2.299	7.06e-219
RECQL4	ENSG00000160957.12	19.32	3.135	2.297	2.48e-160
Metazoa_SRP	ENSG00000274012.1	1052.06	213.3	2.297	3.62e-71
NPM3	ENSG00000107833.10	68.936	13.26	2.294	1.46e-216
TMEM132A	ENSG00000006118.14	51.12	9.69	2.286	6.75e-163
IGHV2-26	ENSG00000211951.2	18.845	3.07	2.286	3.16e-36
IGLC2	ENSG00000211677.2	3181.63	652.325	2.284	4.42e-32
GPC1	ENSG00000063660.8	117.983	23.495	2.28	4.37e-112
CYP24A1	ENSG00000019186.9	4.435	0.125	2.272	5.07e-59
RP11-443P15.2	ENSG00000171658.8	8.275	0.92	2.272	3.7e-58
AC055736.2	ENSG00000280966.1	3.825	0	2.271	2.2e-52
DUXAP9	ENSG00000225210.9	7.25	0.71	2.27	6.72e-122
RNASEH2A	ENSG00000104889.4	45.754	8.7	2.269	1.11e-217
ABCA13	ENSG00000179869.14	6.41	0.555	2.253	9.47e-72
LINC00519	ENSG00000258955.1	4.19	0.09	2.251	4.45e-128
MAGEA9B	ENSG00000267978.5	3.755	0	2.249	1.31e-69
CTB-63M22.1	ENSG00000229119.3	147.543	30.26	2.248	1.42e-73
IGHV3-30	ENSG00000270550.1	217.315	45.005	2.247	2.47e-30
CCDC34	ENSG00000109881.16	13.305	2.02	2.244	1.2e-211
ANKRD22	ENSG00000152766.5	9.525	1.225	2.242	1.16e-134
SORD	ENSG00000140263.13	26.349	4.795	2.239	8.86e-179
MCM10	ENSG00000065328.16	5.07	0.29	2.234	1.22e-236
BTBD11	ENSG00000151136.14	5.535	0.39	2.233	3.19e-139
MFI2	ENSG00000163975.11	16.34	2.7	2.229	3.29e-117
RP11-783K16.5	ENSG00000256940.1	6.515	0.61	2.223	7.77e-147
C16orf59	ENSG00000162062.14	6.835	0.68	2.221	1.98e-194
GAPDH	ENSG00000111640.14	5543.95	1190.33	2.219	1.18e-191
DUSP9	ENSG00000130829.17	3.83	0.04	2.215	1.42e-150
IGHV3-11	ENSG00000211941.3	58.096	11.745	2.213	6.65e-31
C1orf106	ENSG00000163362.10	22.01	3.97	2.211	1.46e-179
SORD2P	ENSG00000259479.6	10.15	1.41	2.21	1.27e-181
RP11-667K14.4	ENSG00000262533.1	3.625	0	2.209	1.91e-68
STMN1	ENSG00000117632.20	264.467	56.635	2.204	3.21e-176
GNG4	ENSG00000168243.10	4.07	0.1	2.204	1.9e-111
IGHV1-2	ENSG00000211934.3	52.87	10.694	2.204	6.39e-28
IGFL2	ENSG00000204866.8	4.065	0.1	2.203	2.24e-102
HOXB7	ENSG00000260027.4	15.775	2.645	2.202	2.04e-106
NMU	ENSG00000109255.11	5.3	0.37	2.201	9.36e-89
GCLC	ENSG00000001084.10	62.78	12.89	2.199	2.78e-103
IGHV1-46	ENSG00000211962.2	20.205	3.62	2.198	6.04e-38
CNTNAP2	ENSG00000174469.17	3.98	0.09	2.192	2.09e-90
CXADR	ENSG00000154639.18	22.525	4.15	2.192	7.49e-149
IL20RB	ENSG00000174564.12	7.985	0.97	2.189	1e-90
IGKV1-16	ENSG00000240864.3	65.7	13.65	2.187	7.47e-29
POF1B	ENSG00000124429.17	6.145	0.57	2.186	4.07e-98
DDIAS	ENSG00000165490.12	6.46	0.64	2.185	4.23e-203
IGKV3D-11	ENSG00000211632.3	7.52	0.875	2.184	5.7e-57
IGLC1	ENSG00000211675.2	1227.28	269.221	2.184	8.96e-30
RP11-10G12.1	ENSG00000244538.1	3.535	0	2.181	3.38e-135
IGKV3D-20	ENSG00000211625.2	12.845	2.055	2.18	8.68e-41
AC006262.5	ENSG00000268621.5	3.53	0	2.179	5.97e-83
HOXD11	ENSG00000128713.12	3.52	0	2.176	7.75e-128
PKP3	ENSG00000184363.9	63.26	13.235	2.174	3.83e-169
PARPBP	ENSG00000185480.11	8.31	1.07	2.169	7.73e-214
B3GNT3	ENSG00000179913.10	4.91	0.32	2.163	6.77e-105
STRA6	ENSG00000137868.18	4.5	0.23	2.161	1.69e-107
RAB38	ENSG00000123892.11	23.605	4.505	2.16	1.6e-110
FDCSP	ENSG00000181617.5	3.915	0.1	2.16	2.06e-47
CCNE1	ENSG00000105173.13	8.865	1.21	2.158	1.05e-182
PTGFRN	ENSG00000134247.9	56.189	11.83	2.156	1.31e-154
FAM111B	ENSG00000189057.10	5.015	0.35	2.156	2.52e-138
EIF1AXP1	ENSG00000236698.1	15.32	2.665	2.155	1.78e-146
CHRNA5	ENSG00000169684.13	5.31	0.43	2.142	1.64e-171
MMP13	ENSG00000137745.11	3.48	0.015	2.142	6.02e-70
IGLV6-57	ENSG00000211640.3	42.025	8.75	2.142	6.99e-36
TRPV4	ENSG00000111199.10	11.36	1.805	2.14	2.85e-116
PLAU	ENSG00000122861.15	88.849	19.4	2.139	4.51e-107
UBE2SP1	ENSG00000233966.1	5.785	0.54	2.139	2.04e-190
ARHGAP11A	ENSG00000198826.10	9.175	1.315	2.136	2.72e-199
FUT2	ENSG00000176920.11	6.425	0.69	2.135	2.15e-117
IGKV2-28	ENSG00000244116.3	317.771	71.689	2.133	1.92e-28
CDCA2	ENSG00000184661.13	4.6	0.28	2.129	4.89e-237
GRHL2	ENSG00000083307.10	19.805	3.755	2.129	2.25e-196
ABCC5	ENSG00000114770.16	68.154	14.885	2.122	6.86e-84
CKS2	ENSG00000123975.4	104.025	23.145	2.121	4.83e-164
FAM3C2	ENSG00000174028.6	37.409	7.835	2.12	2.36e-138
ZFPM2-AS1	ENSG00000251003.7	3.93	0.135	2.119	7.12e-85
FAM162A	ENSG00000114023.15	149.297	33.625	2.118	1.33e-189
CYP4F11	ENSG00000171903.16	5.35	0.465	2.116	3.22e-66
RHNO1	ENSG00000171792.10	40.29	8.525	2.116	1.62e-233
TMEM158	ENSG00000249992.1	8.15	1.11	2.116	2.28e-105
HELLS	ENSG00000119969.14	10.02	1.55	2.112	1.93e-191
RACGAP1	ENSG00000161800.12	29.455	6.05	2.111	4.73e-221
IGHV3-49	ENSG00000211965.3	25	5.025	2.109	6.25e-34
IGKV2D-29	ENSG00000243264.2	22.795	4.52	2.108	5.96e-32
KLF5	ENSG00000102554.13	88.929	19.965	2.101	5.39e-107
IGHV3-33	ENSG00000211955.2	115.06	26.089	2.099	7.06e-27
MSL3P1	ENSG00000224287.2	4.66	0.33	2.089	2.61e-177
FOXD1-AS1	ENSG00000247993.2	5.72	0.58	2.089	2.2e-98
BARX2	ENSG00000043039.6	3.875	0.15	2.084	4.8e-83
TNNT1	ENSG00000105048.16	19.005	3.725	2.082	2.66e-48
IGHV4-39	ENSG00000211959.2	74.49	16.825	2.082	3.74e-31
LSR	ENSG00000105699.16	158.286	36.659	2.081	3.3e-181
IGLV1-47	ENSG00000211648.2	130.033	29.983	2.08	1.72e-29
SLC25A10	ENSG00000183048.11	27.48	5.76	2.075	2.7e-191
FAM84A	ENSG00000162981.13	22.4	4.56	2.073	7.13e-81
LPAR3	ENSG00000171517.5	7.835	1.1	2.073	2.51e-104
FBXO45	ENSG00000174013.7	16.91	3.255	2.073	1.04e-216
NQO1	ENSG00000181019.12	147.599	34.404	2.069	2.67e-47
KCNG1	ENSG00000026559.13	4.2	0.24	2.068	2.55e-94
SERPINB2	ENSG00000197632.8	5.73	0.605	2.068	4.15e-44
SKP2	ENSG00000145604.15	21.201	4.31	2.064	1.16e-178
XXYLT1	ENSG00000173950.15	26.279	5.535	2.062	1.32e-176
FAM83C	ENSG00000125998.7	3.215	0.01	2.061	1.49e-85
IGHV3-48	ENSG00000211964.3	10.495	1.755	2.061	2.01e-35
IGSF3	ENSG00000143061.17	22.765	4.705	2.059	1.16e-120
RP11-386G11.10	ENSG00000258017.1	155.815	36.63	2.059	1.13e-75
DHFRP1	ENSG00000188985.6	8.46	1.275	2.056	2.17e-147
UGT8	ENSG00000174607.10	4.655	0.36	2.056	5.08e-102
BDH1	ENSG00000161267.11	34.02	7.44	2.053	6.98e-119
EIF4EBP1	ENSG00000187840.4	126.114	29.681	2.051	5.04e-123
HMGN1P36	ENSG00000235734.4	3.145	0	2.051	1.74e-184
GPT2	ENSG00000166123.13	12.745	2.32	2.05	2.17e-152
ADAMDEC1	ENSG00000134028.14	5.81	0.65	2.045	6.56e-84
IGHV4-59	ENSG00000224373.3	80.225	18.685	2.045	1.5e-29
TGFA	ENSG00000163235.15	13.905	2.62	2.042	3.41e-125
OCIAD2	ENSG00000145247.11	119.639	28.4	2.037	1.28e-194
DLX6	ENSG00000006377.10	3.1	0	2.036	8.77e-134
IGLL5	ENSG00000254709.6	135.269	32.231	2.036	1.83e-30
NUDT1	ENSG00000106268.15	61.22	14.22	2.031	6.28e-222
IGKV2D-40	ENSG00000251039.2	7.929	1.19	2.028	5.06e-34
PIGX	ENSG00000163964.13	36.985	8.325	2.026	2.12e-162
GPNMB	ENSG00000136235.15	373.586	91.025	2.025	4.22e-74
RYR1	ENSG00000196218.11	10.795	1.905	2.022	1.44e-90
DQX1	ENSG00000144045.13	3.99	0.23	2.02	6.56e-146
ORC1	ENSG00000085840.12	5.16	0.52	2.019	6.91e-226
ESCO2	ENSG00000171320.14	4.085	0.255	2.019	3.85e-207
CDC25A	ENSG00000164045.11	4.145	0.27	2.018	8.27e-229
CH507-513H4.5	ENSG00000281383.1	4.61	0.385	2.018	1.67e-84
IL36G	ENSG00000136688.10	3.29	0.06	2.017	6.44e-74
IGFL1	ENSG00000188293.5	3.045	0	2.016	2.83e-78
ACTL6A	ENSG00000136518.16	101.824	24.45	2.014	2.66e-193
C12orf54	ENSG00000177627.9	4.61	0.39	2.013	6.08e-84
KLHL13	ENSG00000003096.13	6.785	0.93	2.012	2.93e-97
SRD5A1	ENSG00000145545.11	13.68	2.66	2.004	5.62e-182
IGHV3-15	ENSG00000211943.2	61.462	14.6	2.001	1.92e-27
SBSN	ENSG00000189001.10	5.17	0.545	1.998	1.02e-56
CDH1	ENSG00000039068.18	103.554	25.235	1.995	6.49e-137
C17orf53	ENSG00000125319.14	6.01	0.76	1.994	8.17e-195
CELSR2	ENSG00000143126.7	13.38	2.61	1.994	5.62e-138
SULF1	ENSG00000137573.13	47.735	11.235	1.994	5.82e-85
DDR1	ENSG00000204580.11	182.151	45.06	1.991	2.39e-152
FOXD1	ENSG00000251493.3	4.325	0.34	1.991	7.04e-121
DNAJC19P9	ENSG00000258608.1	4.67	0.43	1.987	1.08e-131
COCH	ENSG00000100473.15	5.65	0.68	1.985	1.06e-78
TNFRSF18	ENSG00000186891.13	15.425	3.15	1.985	1.3e-87
NCCRP1	ENSG00000188505.4	3.71	0.19	1.985	2.72e-89
BARX1	ENSG00000131668.13	3.075	0.03	1.984	1.11e-80
DEFB1	ENSG00000164825.3	15.235	3.105	1.984	2.13e-35
ITGB8	ENSG00000105855.9	11.035	2.045	1.983	2.18e-100
KCNK1	ENSG00000135750.14	21.55	4.71	1.982	2.95e-107
RP11-204C16.4	ENSG00000217624.2	4.035	0.275	1.982	4.8e-197
C3orf67	ENSG00000163689.18	4.17	0.31	1.981	9.92e-165
PCNA	ENSG00000132646.10	148.035	36.741	1.981	8.82e-203
TMEM14A	ENSG00000096092.5	58.785	14.15	1.98	7e-176
TWIST1	ENSG00000122691.12	4.405	0.37	1.98	3.4e-100
RP11-624L4.1	ENSG00000259345.5	3.33	0.1	1.977	9.94e-173
KIF15	ENSG00000163808.16	5.245	0.59	1.974	9.87e-195
RAC3	ENSG00000169750.8	19.675	4.265	1.973	1.75e-126
NGEF	ENSG00000066248.14	4.925	0.51	1.972	8.08e-119
IGLV1-51	ENSG00000211644.2	181.861	45.776	1.967	3.41e-21
IQGAP3	ENSG00000183856.10	7.09	1.07	1.966	2.96e-135
RBP1	ENSG00000114115.9	114.932	28.789	1.96	3.33e-72
HOXD10	ENSG00000128710.5	3.16	0.07	1.959	5.18e-105
IGHV2-70	ENSG00000211974.3	6.23	0.86	1.959	1.72e-28
ADAM12	ENSG00000148848.14	6.09	0.825	1.958	2.41e-97
HRASLS	ENSG00000127252.5	3.7	0.21	1.958	1.86e-107
IGLV1-44	ENSG00000211651.3	127.782	32.155	1.958	1.76e-29
SGOL1	ENSG00000129810.14	4.01	0.29	1.957	1.72e-242
IGKV1-27	ENSG00000244575.3	56.01	13.695	1.956	4.18e-24
MTL5	ENSG00000132749.10	5.55	0.69	1.954	2.41e-153
PRSS21	ENSG00000007038.10	14.645	3.045	1.952	8.97e-26
GINS4	ENSG00000147536.11	6.39	0.91	1.952	2.27e-175
HES2	ENSG00000069812.11	6.785	1.015	1.95	4.82e-96
CKAP2	ENSG00000136108.14	17.2	3.72	1.947	3.77e-214
PSPH	ENSG00000146733.13	18.295	4.02	1.942	6.2e-149
SLC1A4	ENSG00000115902.10	23.855	5.475	1.941	2.78e-123
IGKV3OR2-268	ENSG00000233999.3	3.985	0.3	1.939	4.56e-62
SEMA4B	ENSG00000185033.14	107.295	27.31	1.936	6.32e-99
SLC44A5	ENSG00000137968.16	3.465	0.17	1.932	2.44e-143
CABYR	ENSG00000154040.20	8.145	1.4	1.93	1.44e-85
MYCL	ENSG00000116990.10	8.91	1.6	1.93	9.42e-109
SERPINE2	ENSG00000135919.12	40.47	9.885	1.93	4.64e-65
CENPI	ENSG00000102384.13	4.675	0.49	1.929	9.35e-221
C19orf48	ENSG00000167747.13	61.699	15.555	1.921	2.09e-182
GRHL1	ENSG00000134317.17	14.645	3.13	1.921	3.44e-96
TMPRSS13	ENSG00000137747.14	13.065	2.715	1.921	4.29e-101
YWHAZP4	ENSG00000213131.3	3.895	0.295	1.918	9.14e-229
MXRA5	ENSG00000101825.7	17.275	3.85	1.914	1.73e-67
HIST3H2A	ENSG00000181218.5	15.565	3.395	1.914	1.1e-74
BOLA2B	ENSG00000169627.7	143.832	37.454	1.913	1.15e-192
ZIC2	ENSG00000043355.10	2.84	0.02	1.913	1.18e-120
PAK6	ENSG00000137843.11	6.15	0.9	1.912	1.29e-131
PHGDH	ENSG00000092621.11	61.454	15.615	1.91	7.02e-79
CADM4	ENSG00000105767.2	19.181	4.375	1.909	5.39e-131
ADGRF4	ENSG00000153294.11	3.165	0.11	1.908	2.3e-118
CH17-224D4.2	ENSG00000282651.1	6.797	1.085	1.903	1.38e-22
TRPM2-AS	ENSG00000230061.2	3.035	0.08	1.902	2.08e-98
TP73	ENSG00000078900.14	4.71	0.53	1.9	4.79e-81
CBX2	ENSG00000173894.10	7.96	1.405	1.897	8.36e-114
S1PR5	ENSG00000180739.13	9.84	1.91	1.897	7.24e-73
COL1A1	ENSG00000108821.13	408.756	109.061	1.896	5.51e-42
DSCC1	ENSG00000136982.5	6.725	1.075	1.896	6.18e-203
FST	ENSG00000134363.11	28.185	6.845	1.895	3.73e-49
RP11-423H2.1	ENSG00000170089.15	38.895	9.735	1.894	1.96e-121
IGHV6-1	ENSG00000211933.2	13.455	2.89	1.894	2.41e-37
CCDC58	ENSG00000160124.9	51.255	13.07	1.893	4.27e-201
CDC25C	ENSG00000158402.18	3.525	0.22	1.891	2.14e-222
IGLV3-10	ENSG00000211669.2	60.06	15.474	1.89	2.63e-18
LAPTM4B	ENSG00000104341.16	115.451	30.506	1.886	1.68e-148
FBXO32	ENSG00000156804.7	29.265	7.19	1.886	1.12e-106
RP11-276H19.2	ENSG00000269994.1	3.435	0.2	1.886	1.39e-87
CCT5	ENSG00000150753.11	330.532	88.744	1.885	3.16e-181
HR	ENSG00000168453.14	8.855	1.67	1.884	4.36e-72
AUNIP	ENSG00000127423.10	3.79	0.3	1.882	1e-244
TTLL12	ENSG00000100304.12	50.765	13.08	1.878	4.57e-152
NCAPD2	ENSG00000010292.12	45.26	11.595	1.877	3.62e-171
ESRP1	ENSG00000104413.15	55.51	14.405	1.875	2.73e-183
SMO	ENSG00000128602.9	16.49	3.769	1.875	1.2e-86
RP11-12G12.7	ENSG00000274605.1	9.96	1.99	1.874	4.37e-179
MAGED4B	ENSG00000187243.16	20.01	4.735	1.873	1.45e-84
PCAT6	ENSG00000228288.6	7.705	1.38	1.871	6.21e-156
FAM83H	ENSG00000180921.6	34.711	8.77	1.87	4.74e-163
CTD-2510F5.4	ENSG00000265415.1	3.53	0.24	1.869	1.89e-186
RPP40	ENSG00000124787.13	12.005	2.56	1.869	9.09e-182
CDCP1	ENSG00000163814.7	19.26	4.55	1.868	2.23e-145
CGREF1	ENSG00000138028.14	5.645	0.82	1.868	5.66e-81
MAGEA3	ENSG00000221867.8	2.65	0	1.868	5.45e-62
RP11-173P15.5	ENSG00000256569.1	2.65	0	1.868	7.8e-50
RHBDL2	ENSG00000158315.10	5.22	0.705	1.867	1.69e-125
CCNF	ENSG00000162063.12	7.585	1.355	1.866	1.64e-212
HIST1H2BH	ENSG00000275713.1	5.71	0.845	1.863	8.7e-58
VANGL2	ENSG00000162738.5	18.355	4.325	1.862	1.24e-80
GMPS	ENSG00000163655.15	77.31	20.54	1.862	7.07e-188
NIPSNAP1	ENSG00000184117.11	59.311	15.59	1.862	3.12e-191
IGHV1-3	ENSG00000211935.3	3.195	0.155	1.861	6.98e-17
AK4P1	ENSG00000263535.1	4.385	0.485	1.858	1.92e-145
CTD-2147F2.1	ENSG00000259485.1	2.625	0	1.858	4.62e-84
ZFP64	ENSG00000020256.19	17.825	4.21	1.853	9.04e-199
NCAPG2	ENSG00000146918.19	14.115	3.185	1.853	3.05e-170
CXCL10	ENSG00000169245.5	27.405	6.885	1.849	4.18e-39
EIF5A2	ENSG00000163577.7	9.79	2	1.847	7.55e-125
RP11-61N20.3	ENSG00000226268.3	6.96	1.215	1.845	2.52e-155
E2F7	ENSG00000165891.15	3.345	0.21	1.844	2.33e-174
STAP2	ENSG00000178078.11	51.333	13.575	1.844	1.01e-163
RPL23AP65	ENSG00000243964.1	7.895	1.48	1.843	1.52e-96
RPS2P55	ENSG00000216866.5	5.165	0.72	1.842	2.64e-195
DCUN1D1	ENSG00000043093.13	29.065	7.43	1.834	7.99e-147
ESPL1	ENSG00000135476.11	5.775	0.9	1.834	2.81e-159
TMEM79	ENSG00000163472.18	14.365	3.32	1.831	1.27e-126
CYCSP6	ENSG00000214429.3	2.555	0	1.83	8.65e-96
RP3-461F17.3	ENSG00000268439.5	25.034	6.325	1.83	1.25e-181
SNORA73A	ENSG00000274266.1	2.545	0	1.826	1.26e-20
MRPL3	ENSG00000114686.8	116.751	32.231	1.825	9.44e-199
WNT5A	ENSG00000114251.13	16.3	3.885	1.824	4.93e-69
UCK2	ENSG00000143179.12	41.704	11.105	1.819	2.07e-147
BRIX1	ENSG00000113460.12	56.449	15.29	1.818	6.66e-190
SUMO2P1	ENSG00000235238.1	9.81	2.07	1.816	1.03e-72
UNG	ENSG00000076248.10	42.865	11.47	1.815	1.73e-213
MRPL47	ENSG00000136522.13	81.275	22.39	1.815	2.7e-191
NDUFA4L2	ENSG00000185633.10	162.877	45.654	1.813	1.23e-28
ST14	ENSG00000149418.10	82.839	22.93	1.809	6.02e-152
FAM86JP	ENSG00000171084.15	5.06	0.73	1.809	4.25e-200
RPL41P2	ENSG00000256338.2	118.52	33.121	1.809	5.49e-118
MAP3K13	ENSG00000073803.13	58.185	15.91	1.807	1.54e-155
IGLV2-14	ENSG00000211666.2	334.473	94.972	1.806	1.96e-18
CXCL9	ENSG00000138755.5	19.115	4.755	1.805	4.74e-32
SERPINB7	ENSG00000166396.12	2.775	0.08	1.805	6.59e-79
TMEM117	ENSG00000139173.9	7.675	1.485	1.804	1.89e-161
SNRPD1	ENSG00000167088.10	117.327	33.005	1.799	4.2e-190
H2AFY2	ENSG00000099284.13	22.195	5.68	1.796	4.88e-113
RPL37P6	ENSG00000241431.1	2.47	0	1.795	1.08e-135
IGLV2-11	ENSG00000211668.2	131.566	37.229	1.794	2.91e-20
VPS9D1-AS1	ENSG00000261373.1	7.81	1.54	1.794	1.02e-103
RNA5-8S5	ENSG00000275215.1	1156.94	332.842	1.794	3.91e-56
BRI3BP	ENSG00000184992.10	8.885	1.855	1.792	4.93e-212
TENM2	ENSG00000145934.15	3.395	0.27	1.791	1.16e-65
SIX4	ENSG00000100625.8	3.94	0.43	1.789	3.04e-149
FRMD6	ENSG00000139926.15	27.814	7.34	1.789	1.49e-89
IGLV3-9	ENSG00000211670.2	11.485	2.615	1.788	1.34e-29
MIF	ENSG00000240972.1	785.489	226.944	1.787	1.16e-121
NME2	ENSG00000011052.21	32.46	8.705	1.786	1.04e-116
WDHD1	ENSG00000198554.11	7.705	1.525	1.786	5.88e-159
IGKV6-21	ENSG00000211611.2	11.425	2.615	1.781	1.15e-24
PPAT	ENSG00000128059.8	8.85	1.87	1.779	2.49e-194
RP11-132A1.4	ENSG00000232445.1	3.53	0.32	1.779	4.23e-105
IGHV3-73	ENSG00000211976.2	15.62	3.845	1.778	3.81e-32
LMNB1	ENSG00000113368.11	32.339	8.73	1.777	1.83e-139
HPRT1	ENSG00000165704.14	54.588	15.22	1.777	1.11e-188
PLK4	ENSG00000142731.10	6.755	1.265	1.776	1.37e-181
MTFR2	ENSG00000146410.11	5.915	1.02	1.775	1.6e-203
SRRM3	ENSG00000177679.15	5.96	1.035	1.774	6.28e-90
TSKU	ENSG00000182704.7	48.349	13.43	1.774	5.23e-123
IL1RN	ENSG00000136689.18	43.164	11.935	1.772	5.74e-38
COA6	ENSG00000168275.14	61.547	17.325	1.771	1.84e-147
DIO2	ENSG00000211448.11	3.67	0.37	1.769	3.36e-90
KC6	ENSG00000267313.6	3.055	0.19	1.769	2.29e-90
SPAG5	ENSG00000076382.16	24.28	6.425	1.768	1.44e-110
PTPRF	ENSG00000142949.16	128.671	37.1	1.767	1.56e-149
SLC12A8	ENSG00000221955.10	15.825	3.945	1.767	6.49e-152
CENPK	ENSG00000123219.12	8.49	1.79	1.766	3.57e-160
ERO1L	ENSG00000197930.12	58.511	16.495	1.766	1.83e-116
SHCBP1	ENSG00000171241.8	6.39	1.175	1.765	2.3e-181
IGKV1-6	ENSG00000239855.1	30.765	8.36	1.763	5.67e-26
SOX21-AS1	ENSG00000227640.2	2.52	0.04	1.759	2.02e-123
EXOSC5	ENSG00000077348.8	32.596	8.935	1.758	2.51e-187
SUGCT	ENSG00000175600.15	6.815	1.315	1.755	4.83e-104
MLF1	ENSG00000178053.17	34.296	9.47	1.753	3.84e-99
SCAMP5	ENSG00000198794.11	8.905	1.945	1.75	7.81e-111
ACKR3	ENSG00000144476.5	77.799	22.465	1.748	3.79e-50
POLQ	ENSG00000051341.13	2.995	0.19	1.747	1.11e-156
SLC4A11	ENSG00000088836.12	8.59	1.86	1.745	9.81e-72
AKR1B15	ENSG00000227471.8	2.415	0.02	1.743	7.22e-81
TRIM16L	ENSG00000108448.20	18.73	4.895	1.743	9.35e-73
TENM4	ENSG00000149256.14	3.885	0.46	1.742	3.1e-108
FAM213A	ENSG00000122378.13	67.815	19.585	1.741	2.93e-157
CD79A	ENSG00000105369.9	17.225	4.47	1.736	6.97e-35
GAL	ENSG00000069482.6	2.93	0.18	1.736	6.92e-73
IGLV4-69	ENSG00000211637.2	33.255	9.285	1.736	5.69e-24
CLSPN	ENSG00000092853.13	3.955	0.49	1.734	8.93e-156
MARVELD3	ENSG00000140832.9	10.54	2.47	1.734	1.54e-175
RP11-289I10.2	ENSG00000223612.3	8.945	1.99	1.734	9.97e-128
ENTPD3	ENSG00000168032.8	7.38	1.52	1.733	5.66e-91
TCEA1P2	ENSG00000230409.3	6.975	1.4	1.732	2.41e-117
KIF14	ENSG00000118193.11	2.785	0.14	1.731	4.45e-209
PGAM5	ENSG00000247077.6	35.25	9.945	1.728	3.74e-186
D4S234E	ENSG00000168824.14	5.175	0.865	1.727	1.53e-60
COL3A1	ENSG00000168542.12	424.684	127.769	1.725	2.75e-34
KRTCAP3	ENSG00000157992.12	71.774	21.029	1.724	4.23e-85
MEX3A	ENSG00000254726.2	3.655	0.41	1.723	9.09e-123
ALG3	ENSG00000214160.9	97.005	28.709	1.722	1.46e-145
LRRC8D	ENSG00000171492.14	20.235	5.44	1.721	2.96e-167
GABRA3	ENSG00000011677.12	2.29	0	1.718	8.44e-154
RASAL1	ENSG00000111344.11	3.475	0.36	1.718	4.68e-114
PLEKHG4B	ENSG00000153404.13	4.42	0.65	1.716	5.96e-72
CEACAM5	ENSG00000105388.14	11.74	2.88	1.715	1.36e-26
POLE2	ENSG00000100479.12	7.7	1.655	1.712	3.44e-158
CD9	ENSG00000010278.11	1052.31	320.937	1.71	1.78e-94
SLC6A15	ENSG00000072041.16	2.58	0.095	1.709	3.24e-82
FZD6	ENSG00000164930.11	41.795	12.09	1.709	7e-139
MCM5	ENSG00000100297.15	60.275	17.76	1.708	2.3e-163
ETNK2	ENSG00000143845.14	13.745	3.515	1.707	3.88e-118
H2AFX	ENSG00000188486.3	51.951	15.22	1.707	1.84e-139
IGHV3-53	ENSG00000211967.3	9.205	2.125	1.707	3.32e-31
COL4A6	ENSG00000197565.15	5.705	1.055	1.706	1.3e-54
PAK1	ENSG00000149269.9	62.111	18.345	1.706	4.7e-144
MMP3	ENSG00000149968.11	2.85	0.185	1.7	5.33e-69
SFXN1	ENSG00000164466.12	28.794	8.17	1.7	3.8e-158
MMP9	ENSG00000100985.7	37.135	10.75	1.698	5.24e-43
STIL	ENSG00000123473.15	4.42	0.67	1.698	2.07e-219
KNSTRN	ENSG00000128944.13	26.16	7.37	1.698	1.6e-165
PLD1	ENSG00000075651.15	20.08	5.505	1.696	1.86e-105
SPTSSB	ENSG00000196542.8	2.5	0.08	1.696	1.06e-74
LSM12P1	ENSG00000232024.2	18.845	5.125	1.696	2.55e-144
SLC52A3	ENSG00000101276.14	5.41	0.98	1.695	5.3e-103
FGF12	ENSG00000114279.13	5.135	0.895	1.695	6.13e-70
TPRXL	ENSG00000180438.14	2.595	0.11	1.695	3.04e-120
SPINT2	ENSG00000167642.12	570.743	175.788	1.693	5.28e-145
LRRC15	ENSG00000172061.8	3.585	0.42	1.691	2.01e-62
MARK1	ENSG00000116141.15	10.685	2.625	1.689	8.07e-103
KIF18A	ENSG00000121621.6	4.315	0.65	1.688	1.75e-206
GGCT	ENSG00000006625.17	88.812	26.895	1.687	2.62e-169
RANBP1	ENSG00000099901.16	198.197	60.921	1.686	5.27e-171
OLA1	ENSG00000138430.15	108.6	33.066	1.686	9.53e-207
DCTPP1	ENSG00000179958.8	59.434	17.795	1.685	3.85e-162
PDIA4	ENSG00000155660.10	171.711	52.709	1.685	9.2e-135
GPI	ENSG00000105220.14	362.691	112.15	1.684	6.57e-138
HSPA4L	ENSG00000164070.11	5.935	1.16	1.683	2.29e-114
SHMT2	ENSG00000182199.10	123.956	37.93	1.682	4.27e-133
LMNB2	ENSG00000176619.10	40.949	12.105	1.679	7.04e-135
F2RL1	ENSG00000164251.4	11.86	3.02	1.678	2.31e-97
RSRC1	ENSG00000174891.12	39.749	11.74	1.677	4.29e-191
HAP1	ENSG00000173805.15	3.82	0.51	1.675	2.59e-58
GMNN	ENSG00000112312.9	31.895	9.31	1.674	3.08e-174
HORMAD1	ENSG00000143452.15	2.99	0.25	1.674	5.71e-55
TICRR	ENSG00000140534.13	3.845	0.52	1.672	1.3e-155
RGMA	ENSG00000182175.13	14.45	3.85	1.672	2.37e-52
DCAF13	ENSG00000164934.13	41.685	12.4	1.671	4.9e-186
DERL3	ENSG00000099958.14	31.24	9.14	1.669	3.56e-44
IGHV2-5	ENSG00000211937.3	51.305	15.45	1.669	1.74e-18
GINS3	ENSG00000181938.13	9.515	2.315	1.665	1.16e-183
XRCC2	ENSG00000196584.2	2.96	0.25	1.664	4.3e-189
NUP37	ENSG00000075188.8	36.176	10.74	1.663	3.69e-193
HOXD13	ENSG00000128714.5	2.165	0	1.662	2.46e-82
TPBG	ENSG00000146242.8	24.379	7.02	1.662	6.71e-124
BZW2	ENSG00000136261.14	77.999	24	1.66	1.89e-174
RUVBL1	ENSG00000175792.11	68.483	20.98	1.66	1.67e-170
RP11-1038A11.3	ENSG00000256417.1	2.16	0	1.66	1.53e-154
FAXC	ENSG00000146267.11	10.7	2.705	1.659	1.25e-87
RGS20	ENSG00000147509.13	2.6	0.14	1.659	5.81e-105
CCDC167	ENSG00000198937.8	45.03	13.585	1.658	1.7e-167
ABRACL	ENSG00000146386.7	92.065	28.521	1.657	3.3e-147
CASK	ENSG00000147044.20	33.385	9.905	1.657	5.32e-156
FRRS1	ENSG00000156869.12	8.46	2	1.657	2.57e-116
YWHAZ	ENSG00000164924.17	634.136	200.373	1.657	1.04e-184
MIS18A	ENSG00000159055.3	12.74	3.36	1.656	6.93e-200
HAGLROS	ENSG00000226363.3	2.495	0.11	1.655	6e-120
RP3-512B11.3	ENSG00000261189.1	3.535	0.44	1.655	2.3e-165
CHAC2	ENSG00000143942.4	6.775	1.47	1.654	1.91e-139
KREMEN2	ENSG00000131650.13	2.43	0.09	1.654	6.17e-85
RP11-27G14.4	ENSG00000282221.1	3.375	0.39	1.654	4.7e-169
TACSTD2	ENSG00000184292.6	205.023	64.491	1.653	1.76e-57
ALDOC	ENSG00000109107.13	47.14	14.315	1.652	7.2e-80
MRAP2	ENSG00000135324.5	3.92	0.57	1.648	2.39e-61
FZD10	ENSG00000111432.4	4.325	0.7	1.647	1.37e-60
FIGNL1	ENSG00000132436.11	9.98	2.505	1.647	3.55e-153
OVOS2	ENSG00000177359.17	3.415	0.41	1.647	4.77e-69
XG	ENSG00000124343.12	3.57	0.46	1.646	3.27e-74
TOMM22	ENSG00000100216.5	89.105	27.805	1.645	5.3e-181
AHCY	ENSG00000101444.12	156.15	49.275	1.644	2.64e-173
TRIM59	ENSG00000213186.7	7.095	1.59	1.644	2.23e-155
BYSL	ENSG00000112578.9	26.664	7.855	1.643	4.86e-153
CASC5	ENSG00000137812.19	3.545	0.455	1.643	9.16e-195
PTGES	ENSG00000148344.10	18.06	5.105	1.643	2.51e-58
TONSL	ENSG00000160949.16	7.445	1.705	1.643	6.41e-131
WFDC5	ENSG00000175121.11	2.78	0.21	1.643	6.43e-70
IGHV4-61	ENSG00000211970.3	23.735	6.92	1.643	1.32e-22
RAB10	ENSG00000084733.10	127.441	40.204	1.64	2.34e-181
PGLYRP3	ENSG00000159527.3	2.115	0	1.639	1.63e-86
FAM60A	ENSG00000139146.13	61.605	19.13	1.637	1.18e-155
IGKV1D-16	ENSG00000241244.1	7.004	1.575	1.636	2.77e-27
EZH2	ENSG00000106462.10	14.215	3.905	1.633	9.19e-117
RP11-294C11.2	ENSG00000278263.2	2.1	0	1.632	1.36e-64
B3GNT5	ENSG00000176597.11	41.86	12.855	1.629	3.07e-88
MFAP2	ENSG00000117122.13	64.94	20.34	1.628	6.49e-76
SGPP2	ENSG00000163082.9	14.965	4.165	1.628	4.01e-65
PKP2	ENSG00000057294.13	7.23	1.665	1.627	1.07e-74
ZNF695	ENSG00000197472.14	2.275	0.06	1.627	1.1e-120
PPAPDC1A	ENSG00000203805.10	2.49	0.13	1.627	6.2e-113
DUSP14	ENSG00000276023.4	27.28	8.165	1.626	7.11e-115
PKM	ENSG00000067225.17	1080.44	349.33	1.626	8.91e-154
IGLC7	ENSG00000211685.3	16.095	4.54	1.626	1.06e-22
EPCAM	ENSG00000119888.10	180.605	57.889	1.625	1.26e-65
CALML5	ENSG00000178372.7	3.3	0.395	1.624	3.37e-48
EFNA4	ENSG00000243364.7	17.36	4.96	1.623	1.06e-198
TPI1	ENSG00000111669.14	1076.25	348.689	1.623	7.96e-151
SUV39H2	ENSG00000152455.15	8.55	2.1	1.623	4.76e-193
IGKV2-24	ENSG00000241294.1	40.215	12.385	1.623	4.52e-17
WDR62	ENSG00000075702.16	4.97	0.94	1.622	7.5e-133
MAP7	ENSG00000135525.18	17.4	4.98	1.622	1.74e-147
SERINC2	ENSG00000168528.11	74.119	23.405	1.622	1.52e-91
DKK1	ENSG00000107984.9	6.335	1.385	1.621	1.89e-51
HOXC13	ENSG00000123364.4	2.075	0	1.621	5.22e-130
IGSF11	ENSG00000144847.12	2.505	0.14	1.62	9.08e-110
CENPL	ENSG00000120334.15	7.97	1.92	1.619	1.74e-202
AL162151.3	ENSG00000234648.1	762.027	247.605	1.618	1.36e-9
IL4I1	ENSG00000104951.15	7.375	1.73	1.617	9.5e-80
RP11-345J4.5	ENSG00000261740.5	41.316	12.8	1.617	6e-151
CTB-193M12.5	ENSG00000280206.1	15.09	4.25	1.616	4.04e-130
PRIM2	ENSG00000146143.17	12.755	3.49	1.615	2.56e-203
RNU1-106P	ENSG00000207110.1	2.06	0	1.614	2.24e-15
CHAF1B	ENSG00000159259.7	5.425	1.1	1.613	8.31e-188
PDK1	ENSG00000152256.13	14.37	4.025	1.613	7.47e-154
UGT1A10	ENSG00000242515.5	2.06	0	1.613	2.62e-61
IGLV1-36	ENSG00000211655.3	9.855	2.55	1.612	5.15e-23
CHEK2	ENSG00000183765.20	20.71	6.125	1.607	1.67e-151
TIMELESS	ENSG00000111602.11	21.43	6.37	1.606	1.42e-139
SOX4	ENSG00000124766.5	30.999	9.515	1.606	5.75e-103
TCF19	ENSG00000137310.11	14.37	4.06	1.603	6.81e-134
NUDT11	ENSG00000196368.4	3.495	0.48	1.603	1.27e-83
CBR3	ENSG00000159231.5	14.545	4.12	1.602	8.56e-84
NUP155	ENSG00000113569.15	18.545	5.44	1.602	1.31e-176
NAA50	ENSG00000121579.12	131.415	42.62	1.602	1.95e-157
RCC2	ENSG00000179051.13	80.345	25.805	1.602	1.44e-175
OPA1	ENSG00000198836.8	42.601	13.365	1.602	6.85e-137
RP11-524H19.2	ENSG00000224984.1	2.035	0	1.602	4.39e-128
HSPB1	ENSG00000106211.8	1530.04	503.796	1.601	1.83e-48
FNDC1	ENSG00000164694.16	4.02	0.655	1.601	1.16e-63
HN1L	ENSG00000206053.12	61.53	19.616	1.601	6.11e-186
SOX2-OT	ENSG00000242808.7	2.67	0.21	1.601	6.14e-68
BLM	ENSG00000197299.10	7.05	1.655	1.6	4.36e-157
PRRG4	ENSG00000135378.3	14.61	4.15	1.6	4.45e-102
ATAD2	ENSG00000156802.12	14.47	4.105	1.599	4.12e-159
EME1	ENSG00000154920.14	5.65	1.195	1.599	6.12e-120
RP11-397A16.1	ENSG00000267284.1	2.03	0	1.599	2.7e-135
STYK1	ENSG00000060140.8	4.02	0.66	1.597	1.33e-153
RP11-452I5.2	ENSG00000266036.1	4.29	0.75	1.596	1.41e-90
NLN	ENSG00000123213.22	11.4	3.105	1.595	1.24e-146
HOXC9	ENSG00000180806.4	2.405	0.13	1.591	4.59e-91
CP	ENSG00000047457.13	27.789	8.57	1.589	4.29e-34
NDE1	ENSG00000072864.12	40.35	12.745	1.589	1.4e-133
FOXN1	ENSG00000109101.7	2.28	0.09	1.589	2.53e-83
TMTC3	ENSG00000139324.11	12.235	3.4	1.589	1.45e-167
FAM57A	ENSG00000167695.14	26.88	8.27	1.589	3.3e-130
GALNT3	ENSG00000115339.13	32.11	10.015	1.588	2.95e-119
GCLM	ENSG00000023909.9	24.05	7.345	1.586	3.17e-74
IL36RN	ENSG00000136695.14	2.03	0.01	1.585	2.56e-80
BCAS4	ENSG00000124243.17	11.755	3.26	1.582	6.88e-129
BID	ENSG00000015475.18	63.46	20.54	1.581	4.85e-139
SHFM1	ENSG00000127922.9	345.477	114.785	1.581	2.57e-158
LINC00885	ENSG00000224652.1	2.47	0.16	1.581	5.52e-112
RP11-295G20.2	ENSG00000233461.5	19.145	5.735	1.581	1.82e-90
DMRT2	ENSG00000173253.14	5.56	1.195	1.579	7.07e-28
ERCC6L	ENSG00000186871.6	2.435	0.15	1.579	9.17e-206
MSH2	ENSG00000095002.12	18.42	5.515	1.576	9.94e-162
PARD6G	ENSG00000178184.15	9.795	2.62	1.576	2.13e-117
NDUFB5	ENSG00000136521.12	153.542	50.885	1.575	1.37e-148
RP11-464D20.2	ENSG00000239246.3	4.3	0.78	1.574	5.9e-125
SLC39A6	ENSG00000141424.12	41.4	13.255	1.573	2.74e-148
TTC22	ENSG00000006555.10	10.03	2.71	1.572	1.24e-122
POPDC3	ENSG00000132429.9	3.31	0.45	1.572	9.38e-55
MINOS1-NBL1	ENSG00000270136.5	6.15	1.405	1.572	1.04e-153
CHODL	ENSG00000154645.13	2.445	0.16	1.57	2.13e-97
NDC1	ENSG00000058804.11	11.68	3.27	1.57	5.14e-204
SIM2	ENSG00000159263.15	2.74	0.26	1.57	1.09e-108
IGLV3-27	ENSG00000211658.2	10.625	2.915	1.57	1.42e-20
FEZF1-AS1	ENSG00000230316.6	2.175	0.07	1.569	8.33e-83
TMEM182	ENSG00000170417.14	4.78	0.95	1.568	6.05e-211
S100A14	ENSG00000189334.8	221.558	74.14	1.567	1.4e-31
SRPRB	ENSG00000144867.11	65.874	21.59	1.566	3.02e-130
SGOL2	ENSG00000163535.17	4.415	0.83	1.565	1.18e-192
UMPS	ENSG00000114491.13	38.009	12.195	1.564	5.49e-162
INCENP	ENSG00000149503.12	17.67	5.325	1.562	1.5e-155
IGKV1D-13	ENSG00000276566.1	7.845	1.995	1.562	2.22e-16
BRIP1	ENSG00000136492.8	2.77	0.28	1.558	2.58e-138
RFC5	ENSG00000111445.13	20.569	6.33	1.557	1.78e-169
IGLV7-43	ENSG00000211652.2	18.699	5.695	1.557	1.11e-21
RAN	ENSG00000132341.11	764.964	259.519	1.556	5.03e-170
FKBP4	ENSG00000004478.7	80.32	26.686	1.554	2.83e-75
RPS28P7	ENSG00000227097.5	942.336	320.292	1.554	1.89e-113
CENPE	ENSG00000138778.11	2.96	0.35	1.553	1.74e-177
MTCH2	ENSG00000109919.9	112.142	37.57	1.553	1.6e-170
LINC00491	ENSG00000250682.5	1.935	0	1.553	1.51e-138
CH17-224D4.1	ENSG00000282639.1	3.004	0.37	1.547	8.72e-26
MRPL36	ENSG00000171421.12	89.29	29.906	1.547	3.88e-165
SOWAHC	ENSG00000198142.4	14.69	4.37	1.547	3.58e-111
CD3EAP	ENSG00000117877.10	7.55	1.93	1.545	2.35e-131
SEZ6L2	ENSG00000174938.14	14.405	4.28	1.545	8.42e-66
MARCKSL1	ENSG00000175130.6	102.639	34.506	1.545	1.28e-95
PLA2G2D	ENSG00000117215.14	2.465	0.19	1.542	7.87e-61
SERTAD4	ENSG00000082497.11	5.585	1.265	1.54	6.5e-89
NEIL3	ENSG00000109674.3	2.255	0.12	1.539	1.06e-175
FAM72C	ENSG00000263513.5	2.69	0.27	1.539	1.66e-140
ZWILCH	ENSG00000174442.11	11.88	3.435	1.538	3.32e-184
LEMD1	ENSG00000186007.9	3.34	0.495	1.538	7.9e-64
ABCA12	ENSG00000144452.14	1.93	0.01	1.537	3.18e-126
S100A11	ENSG00000163191.5	2450.91	844.497	1.536	9.19e-108
TCTEX1D2	ENSG00000213123.10	25.56	8.165	1.535	1.53e-79
FSTL4	ENSG00000053108.16	3.59	0.585	1.534	1.35e-75
TMEM171	ENSG00000157111.12	2.65	0.26	1.534	1.58e-125
CDK4	ENSG00000135446.16	184.068	62.961	1.533	9.81e-143
TXNDC17	ENSG00000129235.10	183.386	62.741	1.532	1.51e-138
FOXD3-AS1	ENSG00000230798.5	1.885	0	1.529	1.21e-95
MCM8	ENSG00000125885.13	8.085	2.15	1.528	1.33e-148
PDLIM4	ENSG00000131435.12	33.175	10.865	1.526	1.03e-45
KRT80	ENSG00000167767.13	10.71	3.065	1.526	4.39e-55
AIM1L	ENSG00000176092.13	6.035	1.445	1.525	9.63e-75
CTD-2231H16.1	ENSG00000249430.1	2.51	0.22	1.525	1.02e-83
PRPS2	ENSG00000101911.12	32.905	10.78	1.525	1.14e-167
MSH6	ENSG00000116062.14	34.559	11.355	1.525	6.3e-140
PPIL1	ENSG00000137168.7	34.651	11.39	1.525	2.53e-153
MZB1	ENSG00000170476.15	46.386	15.465	1.525	3.69e-22
ERVMER34-1	ENSG00000226887.7	3.675	0.625	1.525	1.1e-100
TRAIP	ENSG00000183763.8	5.785	1.36	1.524	3.34e-165
IGHV1-58	ENSG00000211968.3	3.585	0.595	1.523	6.34e-33
CXCL6	ENSG00000124875.9	3.58	0.595	1.522	4.26e-33
E2F1	ENSG00000101412.12	11.315	3.295	1.52	8.3e-114
GJB4	ENSG00000189433.5	1.98	0.04	1.519	1.56e-108
KLK6	ENSG00000167755.13	2.005	0.05	1.517	1.09e-64
DBF4	ENSG00000006634.7	13.705	4.14	1.516	1.39e-163
TGIF2-C20orf24	ENSG00000259399.1	2.89	0.36	1.516	2.7e-89
MET	ENSG00000105976.14	22.31	7.155	1.515	1.97e-76
RP11-277P12.20	ENSG00000245648.1	2.74	0.31	1.513	3.97e-106
AC005538.3	ENSG00000279809.1	2.28	0.15	1.512	4.55e-115
C1orf112	ENSG00000000460.16	7.885	2.115	1.512	2.56e-180
NET1	ENSG00000173848.18	55.705	18.885	1.512	1.73e-121
RNF43	ENSG00000108375.12	10.465	3.025	1.51	1.2e-127
PTDSS1	ENSG00000156471.12	123.506	42.805	1.507	2.42e-127
RP11-231D20.2	ENSG00000253408.5	1.87	0.01	1.507	6.99e-117
TWF1	ENSG00000151239.13	63.44	21.69	1.506	3.39e-178
MRPL12	ENSG00000262814.6	100.61	34.77	1.506	1.05e-135
CCT3	ENSG00000163468.14	221.252	77.313	1.505	5.24e-179
PGK1	ENSG00000102144.13	708.021	249.171	1.503	1.48e-126
CSE1L	ENSG00000124207.16	60.081	20.564	1.502	1.11e-182
SOX9	ENSG00000125398.5	10.495	3.06	1.501	5.46e-52
NDRG1	ENSG00000104419.14	577.328	203.635	1.499	8.11e-52
PFKP	ENSG00000067057.16	67.557	23.27	1.498	3.77e-114
HOXA1	ENSG00000105991.7	2.7	0.31	1.498	4.88e-159
METTL8	ENSG00000123600.18	14.03	4.32	1.498	1.38e-150
IGKV1-12	ENSG00000243290.1	6.385	1.615	1.498	1.89e-28
ARHGEF19	ENSG00000142632.16	22.46	7.32	1.496	6.04e-119
SLC9A7	ENSG00000065923.9	5.46	1.29	1.496	4.07e-141
TMEM177	ENSG00000144120.12	11.75	3.52	1.496	1.6e-169
RAP2B	ENSG00000181467.3	24.595	8.075	1.496	1.5e-135
SNRPE	ENSG00000182004.12	190.995	67.113	1.495	8.26e-176
CTD-2008L17.1	ENSG00000267327.1	1.815	0	1.493	8.77e-97
DKC1	ENSG00000130826.15	63.95	22.079	1.493	1.86e-140
TNFRSF21	ENSG00000146072.6	47.7	16.305	1.493	1.96e-88
MMS22L	ENSG00000146263.11	5.935	1.465	1.492	4.83e-160
RP11-58O9.2	ENSG00000279806.1	1.98	0.06	1.491	3.43e-110
METTL1	ENSG00000037897.16	41.61	14.175	1.49	4.76e-119
TMEM54	ENSG00000121900.18	101.57	35.515	1.49	6.97e-141
C12orf75	ENSG00000235162.8	35.189	11.895	1.489	1.87e-57
NCK1-AS1	ENSG00000239213.5	8.71	2.46	1.489	1.53e-142
AC009065.4	ENSG00000279473.1	1.805	0	1.488	2.13e-68
C3orf58	ENSG00000181744.8	22.51	7.385	1.487	8.72e-68
ENO1	ENSG00000074800.13	1453.23	517.691	1.487	1.24e-122
MAPK6	ENSG00000069956.11	26.1	8.665	1.487	8.24e-144
SLC35F2	ENSG00000110660.14	10.93	3.255	1.487	2.78e-84
RP5-864K19.6	ENSG00000274944.4	2	0.07	1.487	3.17e-70
BRCA1	ENSG00000012048.19	7.575	2.065	1.484	4.05e-130
VPREB3	ENSG00000128218.7	2.86	0.38	1.484	6.13e-78
WDR12	ENSG00000138442.9	42.105	14.405	1.484	2.74e-129
PITX2	ENSG00000164093.15	1.825	0.01	1.484	8.16e-79
MKRN3	ENSG00000179455.7	2.105	0.11	1.484	1.81e-67
UGT1A7	ENSG00000244122.2	1.795	0	1.483	9.57e-59
HSD17B1	ENSG00000108786.10	6.01	1.51	1.482	1.47e-93
GDA	ENSG00000119125.16	1.96	0.06	1.482	6.1e-75
SLC7A1	ENSG00000139514.12	14.895	4.69	1.482	9.17e-95
RP11-424C20.2	ENSG00000256663.1	2.015	0.08	1.481	1.23e-166
AC005537.2	ENSG00000232006.8	1.79	0	1.48	2.14e-145
CH17-212P11.4	ENSG00000282600.1	1.79	0	1.48	1.84e-56
SDHAF3	ENSG00000196636.7	24.16	8.035	1.478	5.87e-130
AC093850.2	ENSG00000230838.1	2.145	0.13	1.477	2.04e-88
EHHADH	ENSG00000113790.10	8.685	2.48	1.477	9.17e-140
E2F8	ENSG00000129173.12	2.7	0.33	1.476	2.7e-153
RNF2	ENSG00000121481.10	18.36	5.97	1.474	1.26e-154
SLC29A4	ENSG00000164638.10	4.375	0.935	1.474	2.91e-87
KIF3C	ENSG00000084731.13	8.83	2.54	1.473	2.05e-113
PSMD14	ENSG00000115233.11	64.126	22.46	1.473	5.08e-169
LINC01503	ENSG00000233901.5	21.995	7.29	1.472	2.11e-80
IGHV3-74	ENSG00000224650.2	22.945	7.635	1.471	6.88e-20
EEF1A1P12	ENSG00000214199.3	2.6	0.3	1.47	2.05e-96
RRM1	ENSG00000167325.14	42.574	14.735	1.47	2.17e-143
RCOR2	ENSG00000167771.5	2.56	0.285	1.47	1.13e-99
FOXRED2	ENSG00000100350.14	12.245	3.785	1.469	1.08e-111
PCCB	ENSG00000114054.13	40.559	14.01	1.469	3.24e-137
AC074286.1	ENSG00000213963.6	5.525	1.36	1.467	3.23e-54
MRPS12	ENSG00000128626.11	64.85	22.82	1.467	5.99e-141
PPP1R14B	ENSG00000173457.10	159.415	57.011	1.467	2.81e-111
RP11-567G11.1	ENSG00000228952.1	1.765	0	1.467	2.02e-84
RP6-65G23.3	ENSG00000259153.1	3.355	0.575	1.467	2.41e-120
NETO2	ENSG00000171208.9	16.735	5.42	1.466	1.55e-75
RP11-215A21.2	ENSG00000236058.3	2.785	0.37	1.466	7e-156
RFC2	ENSG00000049541.10	42.169	14.64	1.465	1.3e-187
SH3BP1	ENSG00000100092.20	40.579	14.06	1.465	1.28e-104
RP11-676M6.1	ENSG00000254612.2	5.46	1.34	1.465	7.83e-147
EHF	ENSG00000135373.12	25.954	8.775	1.463	2.81e-62
POC1A	ENSG00000164087.7	6.685	1.79	1.462	1.35e-168
DLEU1_1	ENSG00000276089.1	3.94	0.795	1.461	1.63e-29
LDHA	ENSG00000134333.13	828.695	300.443	1.461	8.23e-107
GALNT6	ENSG00000139629.15	10.66	3.235	1.461	2.72e-72
DGUOK-AS1	ENSG00000237883.1	6.595	1.76	1.46	2.08e-86
DTYMK	ENSG00000168393.12	38.849	13.48	1.46	7.48e-157
EFCAB11	ENSG00000140025.15	8.475	2.45	1.458	5.26e-159
NXT2	ENSG00000101888.11	12.625	3.96	1.458	1.93e-145
SIAH2	ENSG00000181788.3	39.829	13.885	1.456	3.85e-135
STK26	ENSG00000134602.15	14.505	4.665	1.453	2.61e-121
HOXC10	ENSG00000180818.4	1.875	0.05	1.453	3.38e-69
FAAP24	ENSG00000131944.9	4.905	1.16	1.451	5e-173
PSMD2	ENSG00000175166.16	333.674	121.485	1.45	6.71e-124
SMC2	ENSG00000136824.18	9.345	2.79	1.449	1.34e-139
RP11-742B18.1	ENSG00000249001.5	1.73	0	1.449	1.44e-124
HIST1H4J	ENSG00000197238.4	12.275	3.87	1.447	1.34e-99
SSX2IP	ENSG00000117155.16	8.455	2.47	1.446	8.44e-155
SFRP2	ENSG00000145423.4	83.704	30.079	1.446	1.06e-24
TRIM16	ENSG00000221926.11	45.551	16.085	1.446	8.17e-75
SPRR2F	ENSG00000244094.1	1.725	0	1.446	8.69e-54
UQCC2	ENSG00000137288.9	107.533	38.869	1.445	6.84e-140
TMEM237	ENSG00000155755.18	28.335	9.78	1.444	1.19e-134
CHAF1A	ENSG00000167670.15	14.879	4.84	1.443	2.3e-112
RP11-416L21.2	ENSG00000271134.1	1.715	0	1.441	1.25e-98
ERGIC2	ENSG00000087502.17	80.158	28.924	1.439	9.22e-170
FBL	ENSG00000105202.7	345.369	127.053	1.436	1.36e-124
RCC1	ENSG00000180198.15	35.595	12.525	1.436	8.42e-147
TMPRSS11A	ENSG00000187054.14	1.705	0	1.436	1.01e-66
PRR15	ENSG00000176532.3	4.76	1.13	1.435	4.52e-33
NKAIN2	ENSG00000188580.13	1.84	0.05	1.435	5.18e-80
CKAP4	ENSG00000136026.13	86.046	31.205	1.434	1.52e-103
DARS2	ENSG00000117593.9	15.49	5.105	1.434	2.98e-148
RAB6B	ENSG00000154917.10	8.35	2.46	1.434	3.36e-48
ARHGEF35	ENSG00000213214.4	11.625	3.675	1.433	1.07e-53
ITGA6	ENSG00000091409.14	70.095	25.325	1.433	4.84e-61
PADI3	ENSG00000142619.4	1.7	0	1.433	1.53e-66
NUDT8	ENSG00000167799.9	20.554	6.985	1.433	7.45e-90
SNRPG	ENSG00000143977.13	206.922	76.077	1.432	2.88e-147
PSMG3	ENSG00000157778.8	69.675	25.201	1.432	6.51e-166
WDR3	ENSG00000065183.15	11.62	3.68	1.431	8.28e-114
PARL	ENSG00000175193.12	105.547	38.505	1.431	6.46e-143
CTD-2021H9.3	ENSG00000258053.1	1.695	0	1.43	4.5e-91
KIF21A	ENSG00000139116.17	11.905	3.79	1.43	6.5e-84
PLOD2	ENSG00000152952.11	38.439	13.645	1.429	1.02e-71
TARS	ENSG00000113407.13	100.649	36.785	1.428	3.27e-124
RP11-379B8.1	ENSG00000226453.1	2.255	0.21	1.428	8.44e-119
CPXM1	ENSG00000088882.7	7.825	2.285	1.426	4.1e-32
ANKRD18B	ENSG00000230453.9	1.83	0.055	1.424	3.62e-108
RMI1	ENSG00000178966.15	7.24	2.07	1.424	9.66e-146
PVT1	ENSG00000249859.7	28.585	10.025	1.424	1.43e-63
IGLV2-8	ENSG00000278196.1	66.701	24.245	1.423	2.21e-12
ALDH18A1	ENSG00000059573.8	35.305	12.545	1.422	2.67e-171
MAGOHB	ENSG00000111196.9	31.555	11.175	1.419	6.03e-156
DYNC1I1	ENSG00000158560.14	4.69	1.13	1.418	2.37e-71
ST6GALNAC2	ENSG00000070731.9	45.494	16.425	1.416	3.18e-45
TP53AIP1	ENSG00000120471.14	2.04	0.14	1.415	1.07e-58
CTA-384D8.35	ENSG00000272666.1	5.98	1.62	1.414	1.39e-79
C10orf2	ENSG00000107815.7	8.15	2.435	1.413	1.27e-137
SNAI2	ENSG00000019549.8	28.395	10.035	1.413	2.8e-60
TRMT10C	ENSG00000174173.6	23.894	8.35	1.413	2.58e-144
SHISA2	ENSG00000180730.4	5.1	1.29	1.413	5.88e-36
LL22NC03-N14H11.1	ENSG00000272872.1	4.74	1.155	1.413	8.05e-61
HILPDA	ENSG00000135245.9	31.714	11.29	1.412	1.21e-18
SESN3	ENSG00000149212.10	21.994	7.64	1.412	3.77e-52
NUS1P1	ENSG00000235636.1	4.135	0.93	1.412	4.51e-126
ENO1P1	ENSG00000244457.2	2.27	0.23	1.411	1.57e-94
TECRP1	ENSG00000235043.3	8.765	2.675	1.41	3.71e-111
SLC39A11	ENSG00000133195.11	26.764	9.455	1.409	2.31e-146
RP11-411K7.1	ENSG00000236740.6	1.815	0.06	1.409	4.58e-93
PSMC1P1	ENSG00000241506.1	34.744	12.46	1.409	2.12e-128
MREG	ENSG00000118242.15	14.36	4.79	1.408	8.35e-136
TMEM19	ENSG00000139291.13	24.43	8.585	1.408	1.28e-126
POLR2D	ENSG00000144231.10	24.965	8.785	1.408	5.01e-167
IGHV4-4	ENSG00000276775.1	9.66	3.02	1.407	1.19e-16
AKR1C3	ENSG00000196139.11	139.865	52.16	1.406	4.04e-15
RAPGEFL1	ENSG00000108352.11	27.23	9.655	1.406	1.81e-46
P3H4	ENSG00000141696.12	20.564	7.135	1.406	6.02e-87
HK2	ENSG00000159399.9	34.53	12.405	1.406	2.84e-74
XPR1	ENSG00000143324.13	23.92	8.41	1.405	1.05e-116
BTF3L4P2	ENSG00000213189.5	57.12	20.97	1.404	2.29e-152
CCDC86	ENSG00000110104.11	29.161	10.4	1.404	1.04e-115
POSTN	ENSG00000133110.14	92.135	34.185	1.404	7.88e-34
TDRD5	ENSG00000162782.15	1.83	0.07	1.403	7.04e-83
RPL39P3	ENSG00000235174.1	822.401	310.348	1.403	2.43e-68
AP1S1	ENSG00000106367.13	66.546	24.56	1.402	4.97e-146
UGDH	ENSG00000109814.11	44.103	16.07	1.402	6.07e-70
ENTPD7	ENSG00000198018.6	6.85	1.97	1.402	4.1e-128
RP11-160O5.1	ENSG00000263470.1	8.38	2.55	1.402	1.44e-67
GPRIN1	ENSG00000169258.6	2.8	0.44	1.4	3.1e-126
CHMP4C	ENSG00000164695.4	14.075	4.715	1.399	5.38e-106
SPAST	ENSG00000021574.11	11.05	3.57	1.399	9.5e-153
TMEM106B	ENSG00000106460.18	25.145	8.93	1.397	2.85e-140
NELL2	ENSG00000184613.10	7.165	2.1	1.397	2.08e-46
IGLV7-46	ENSG00000211649.3	21.035	7.375	1.396	7.31e-18
SMKR1	ENSG00000240204.2	2.83	0.455	1.396	1.77e-67
TRIM2	ENSG00000109654.14	18.26	6.325	1.395	1.22e-70
C10orf35	ENSG00000171224.8	15.305	5.205	1.394	4.29e-130
POU6F2	ENSG00000106536.19	1.655	0.01	1.394	1.72e-132
PDCD2L	ENSG00000126249.7	13.47	4.505	1.394	1.24e-144
TUFT1	ENSG00000143367.15	23.155	8.195	1.393	6.23e-90
SHOX2	ENSG00000168779.19	2.125	0.19	1.393	2.67e-97
COQ3	ENSG00000132423.10	12.765	4.245	1.392	3.18e-156
LINC01116	ENSG00000163364.9	2.36	0.28	1.392	5.58e-82
TUBB	ENSG00000196230.12	561.989	213.552	1.392	7.19e-133
ULBP3	ENSG00000131019.10	3.195	0.6	1.391	2.47e-109
TBCAP1	ENSG00000226781.1	2.435	0.31	1.391	1.24e-135
RP1-152L7.5	ENSG00000216775.2	6.17	1.735	1.39	2.34e-54
NMNAT3	ENSG00000163864.14	11.285	3.69	1.389	4.15e-80
SLC16A9	ENSG00000165449.11	3.32	0.65	1.389	3.37e-67
TSPAN6	ENSG00000000003.14	33.225	12.09	1.387	8.05e-114
PIK3R2	ENSG00000105647.14	36.131	13.205	1.386	6.76e-128
NIFK	ENSG00000155438.11	59.354	22.105	1.385	7.99e-146
ZNF385A	ENSG00000161642.17	56.49	21.03	1.384	2.68e-99
MRPL13	ENSG00000172172.7	55.366	20.594	1.384	2.85e-167
IGLV9-49	ENSG00000223350.2	7.545	2.275	1.384	2.83e-20
LAGE3	ENSG00000196976.6	44.575	16.485	1.382	4.18e-147
CCNO	ENSG00000152669.8	3.18	0.605	1.381	8.17e-34
VRK1	ENSG00000100749.7	17.45	6.09	1.38	3.07e-121
DCUN1D5	ENSG00000137692.11	40.109	14.805	1.379	4.91e-144
MRPS33	ENSG00000090263.15	81.707	30.8	1.379	1.65e-153
WDR43	ENSG00000163811.11	28.365	10.29	1.379	5.06e-145
YEATS4	ENSG00000127337.6	22.355	7.99	1.377	1.69e-139
FAM72D	ENSG00000215784.5	2.765	0.45	1.377	7.69e-143
PDCD10	ENSG00000114209.14	86.446	32.695	1.376	2.01e-137
PYCRL	ENSG00000104524.13	13.085	4.435	1.374	6.49e-134
CLDN10	ENSG00000134873.9	5.85	1.645	1.373	5.84e-33
PNO1	ENSG00000115946.7	24.645	8.91	1.372	2.1e-131
TFB2M	ENSG00000162851.7	16.82	5.885	1.372	4.49e-164
RP11-486L19.2	ENSG00000250685.7	1.64	0.02	1.372	8.63e-120
RBBP8NL	ENSG00000130701.3	2	0.16	1.371	1.13e-133
MSI2	ENSG00000153944.10	26.24	9.53	1.371	1.85e-99
RP11-641D5.1	ENSG00000213178.3	289.937	111.507	1.371	2.32e-119
CACYBP	ENSG00000116161.17	101.142	38.514	1.37	1.07e-104
IDH2	ENSG00000182054.9	117.812	44.96	1.37	7.02e-132
LGR4	ENSG00000205213.13	9.41	3.03	1.369	1.9e-90
SLCO1A2	ENSG00000084453.16	2.51	0.36	1.368	4.52e-53
HNRNPA1P10	ENSG00000214223.4	7.645	2.35	1.368	1.33e-121
TMED3	ENSG00000166557.12	115.235	44.074	1.367	6.32e-153
LIN9	ENSG00000183814.15	4.765	1.235	1.367	1.31e-173
RP4-800G7.1	ENSG00000239719.1	1.58	0	1.367	2.44e-30
BOLA3	ENSG00000163170.11	65.375	24.755	1.366	4.42e-124
FHOD3	ENSG00000134775.15	4.464	1.12	1.366	1.49e-50
KDF1	ENSG00000175707.8	14.435	4.99	1.366	3.98e-143
PRDX4	ENSG00000123131.12	134.605	51.654	1.365	9.39e-141
MZT2A	ENSG00000173272.13	96.041	36.69	1.364	1.64e-129
RP11-805J14.5	ENSG00000254721.1	10	3.275	1.364	3.92e-91
PFDN4	ENSG00000101132.9	55.28	20.875	1.363	4.17e-153
PRIM1	ENSG00000198056.13	11.495	3.865	1.361	1.08e-136
PGLYRP4	ENSG00000163218.14	1.67	0.04	1.36	4.25e-80
MRPL30	ENSG00000185414.19	26.546	9.73	1.36	1.16e-190
RP11-334E6.12	ENSG00000263873.1	18.725	6.684	1.36	1.51e-32
SNRPB	ENSG00000125835.17	297.119	115.303	1.358	6.1e-137
NIP7	ENSG00000132603.13	26.109	9.58	1.357	4.56e-145
IGHV3-13	ENSG00000211942.3	6.67	1.995	1.357	2.78e-23
H2BFS	ENSG00000234289.5	8.27	2.62	1.357	2.1e-81
ANXA2P2	ENSG00000231991.4	30.12	11.16	1.356	1.27e-80
CCDC138	ENSG00000163006.11	4.39	1.105	1.356	2.22e-143
CERS6	ENSG00000172292.14	15.825	5.575	1.356	2.78e-101
PTPRH	ENSG00000080031.9	1.865	0.12	1.355	1.97e-93
MRPL19	ENSG00000115364.13	31.23	11.6	1.355	4.74e-163
KRT42P	ENSG00000214514.7	1.94	0.15	1.354	8.2e-63
NCS1	ENSG00000107130.9	18.075	6.47	1.353	4.08e-75
PPP1R14C	ENSG00000198729.4	22.434	8.175	1.353	1.56e-38
CDHR1	ENSG00000148600.14	2.715	0.455	1.352	1.18e-62
CENPP	ENSG00000188312.13	6.045	1.76	1.352	2.94e-136
DNAH14	ENSG00000185842.14	9.08	2.95	1.352	5.94e-75
PLCH2	ENSG00000149527.17	8.61	2.765	1.352	9.71e-38
CLSTN1	ENSG00000171603.16	127.3	49.29	1.351	3.58e-102
PITPNA-AS1	ENSG00000236618.2	16.105	5.705	1.351	1.75e-115
HLTF	ENSG00000071794.15	14.95	5.26	1.349	4.41e-99
FAM83G	ENSG00000188522.14	10.16	3.38	1.349	1.79e-98
DSG1-AS1	ENSG00000266729.5	1.545	0	1.348	1.15e-96
MCM7	ENSG00000166508.17	103.877	40.196	1.348	1.08e-120
FAM110C	ENSG00000184731.5	10.895	3.675	1.347	3.89e-46
MRPL42	ENSG00000198015.12	53.006	20.225	1.347	9.38e-172
AADACP1	ENSG00000240602.7	2.1	0.22	1.345	3e-62
C2CD4A	ENSG00000198535.5	1.845	0.12	1.345	1.08e-68
FAM103A2P	ENSG00000235272.1	10.51	3.53	1.345	3.98e-58
CTD-2256P15.2	ENSG00000259802.1	3.545	0.79	1.344	5.84e-134
LPAR5	ENSG00000184574.9	4.79	1.28	1.344	4.43e-102
DLX6-AS1	ENSG00000231764.8	1.55	0.005	1.343	1.38e-106
LINC01605	ENSG00000253161.5	1.835	0.12	1.34	2.9e-79
RP11-303E16.2	ENSG00000261061.1	6.885	2.115	1.34	2.92e-134
PGF	ENSG00000119630.13	17.905	6.475	1.339	3.69e-57
RP11-293I14.2	ENSG00000258064.1	1.53	0	1.339	8.76e-60
CENPO	ENSG00000138092.10	11.175	3.82	1.337	6.22e-142
CHRM3	ENSG00000133019.11	3.695	0.86	1.336	9.78e-74
HSPE1	ENSG00000115541.10	276.234	108.853	1.336	2.92e-70
HOXC6	ENSG00000197757.7	2.75	0.485	1.336	8.67e-68
KRT8	ENSG00000170421.11	514.65	203.388	1.335	2.79e-56
TMED10	ENSG00000170348.8	233.705	92.081	1.334	1.78e-129
EPHB2	ENSG00000133216.16	5.955	1.76	1.333	1.98e-67
GSTO2	ENSG00000065621.14	12.805	4.485	1.332	3.12e-36
UCN2	ENSG00000145040.3	1.87	0.14	1.332	8.56e-85
RPS7P11	ENSG00000213326.4	5.57	1.61	1.332	5.46e-101
CYP2C18	ENSG00000108242.12	2.155	0.255	1.33	8.92e-67
GOLM1	ENSG00000135052.16	32.434	12.295	1.33	1.13e-76
CCAT1	ENSG00000247844.1	1.51	0	1.328	7.77e-66
AC144530.1	ENSG00000234742.1	2.435	0.37	1.326	7.85e-106
EXOSC4	ENSG00000178896.6	45.019	17.349	1.326	2.19e-133
FGFR3	ENSG00000068078.17	27.469	10.36	1.325	5.16e-37
S100A16	ENSG00000188643.10	377.791	150.158	1.325	1.44e-56
RP11-408B11.2	ENSG00000258815.1	1.505	0	1.325	1.03e-112
FXR1	ENSG00000114416.17	127.658	50.39	1.324	5.87e-106
NCBP2	ENSG00000114503.10	87.332	34.279	1.324	5.53e-136
ATP5G1	ENSG00000159199.13	222.652	88.425	1.323	1.82e-119
MCM6	ENSG00000076003.4	24.466	9.18	1.323	8.52e-138
MTX2	ENSG00000128654.13	45.69	17.665	1.323	8.64e-181
PRKDC	ENSG00000253729.7	83.484	32.785	1.322	1.17e-116
CCL20	ENSG00000115009.11	18.819	6.935	1.321	8.95e-9
SLC52A1	ENSG00000132517.14	2.235	0.295	1.321	4.47e-81
ACTR3	ENSG00000115091.11	183.609	72.945	1.32	2.87e-122
CCT4	ENSG00000115484.14	147.906	58.645	1.32	1.01e-134
ODC1	ENSG00000115758.12	112.465	44.444	1.32	2.85e-57
PSMD11	ENSG00000108671.9	114.566	45.31	1.319	4.65e-103
ADORA2B	ENSG00000170425.3	8.55	2.83	1.318	1.99e-79
EPT1	ENSG00000138018.17	12.44	4.39	1.318	1.92e-119
IGLV5-45	ENSG00000211650.2	10.185	3.485	1.318	8.39e-17
GCSHP5	ENSG00000224837.1	22.715	8.51	1.318	7.5e-112
RP11-481J2.3	ENSG00000276131.1	2.44	0.38	1.318	1.16e-105
MGME1	ENSG00000125871.13	21.36	7.975	1.317	5.76e-147
MTBP	ENSG00000172167.7	3.785	0.92	1.317	2.45e-165
RAD54B	ENSG00000197275.12	5.055	1.43	1.317	3.7e-130
CTC-526N19.1	ENSG00000277013.1	4.255	1.11	1.316	1.02e-61
YDJC	ENSG00000161179.13	29.509	11.25	1.316	2.98e-118
RP11-334C17.6	ENSG00000275479.1	1.49	0	1.316	1.14e-6
RAE1	ENSG00000101146.12	37.955	14.66	1.315	2.96e-171
POU2AF1	ENSG00000110777.11	10.675	3.7	1.313	1.02e-32
NMB	ENSG00000197696.9	16.685	6.125	1.312	2.52e-64
BZW1P2	ENSG00000198406.7	21.655	8.13	1.311	7.68e-71
TMCO1	ENSG00000143183.16	116.311	46.301	1.31	3.95e-150
RBBP8	ENSG00000101773.16	36.166	14.01	1.308	7.92e-105
IGKV1-39	ENSG00000242371.1	5.72	1.715	1.308	7.1e-21
RIPK4	ENSG00000183421.11	13.365	4.805	1.307	9.16e-92
RHOD	ENSG00000173156.6	27.6	10.57	1.306	6.67e-81
AC239868.2	ENSG00000280874.1	28.408	10.91	1.304	1.62e-12
B4GALNT1	ENSG00000135454.13	5.31	1.555	1.304	3.76e-55
DHFR	ENSG00000228716.6	13.555	4.9	1.303	3.44e-125
SULF2	ENSG00000196562.14	56.455	22.28	1.303	2.26e-48
MICALL1	ENSG00000100139.13	37.415	14.58	1.302	4.89e-80
RP11-1103G16.1	ENSG00000257636.6	1.465	0	1.302	2.34e-111
LINC01564	ENSG00000235899.1	1.685	0.09	1.301	3.44e-77
CRISPLD1	ENSG00000121005.8	4.81	1.36	1.3	6.89e-65
RPL35P1	ENSG00000237991.3	3.16	0.69	1.3	5.4e-105
C6orf132	ENSG00000188112.8	16.52	6.12	1.299	9.77e-79
SDR42E1	ENSG00000184860.9	4.845	1.375	1.299	2.01e-89
GLTP	ENSG00000139433.9	66.883	26.616	1.298	2.37e-103
NCBP2-AS2	ENSG00000270170.1	39.424	15.44	1.298	1.93e-110
AC239868.3	ENSG00000281134.1	28.408	10.965	1.297	1.71e-12
CIB2	ENSG00000136425.12	9.245	3.17	1.297	5.16e-75
CMSS1	ENSG00000184220.10	39.454	15.465	1.297	9.29e-114
CNTN1	ENSG00000018236.14	5.08	1.475	1.297	4.19e-38
OR2I1P	ENSG00000237988.3	2.71	0.51	1.297	1.92e-44
NME1-NME2	ENSG00000243678.11	848.575	344.855	1.297	6.33e-112
ALYREF	ENSG00000183684.7	110.56	44.449	1.296	1.71e-133
ANXA8L1	ENSG00000264230.7	39.868	15.64	1.296	9.15e-18
B4GALT4	ENSG00000121578.12	32.64	12.7	1.296	1.15e-87
CBR1	ENSG00000159228.12	121.92	49.073	1.296	1.19e-56
CDK5R1	ENSG00000176749.8	3.495	0.83	1.296	6.78e-125
AC016292.3	ENSG00000108958.4	3.16	0.695	1.295	8.36e-146
TIMM8A	ENSG00000126953.5	8.36	2.815	1.295	1.63e-157
TRMT6	ENSG00000089195.14	18.16	6.815	1.294	2.7e-139
MRPS30	ENSG00000112996.9	33.531	13.08	1.294	8.08e-156
LRP12	ENSG00000147650.11	11.015	3.9	1.294	4.86e-71
BORA	ENSG00000136122.15	6.265	1.965	1.293	2.87e-153
VANGL1	ENSG00000173218.14	6.645	2.12	1.293	1.4e-136
TMEM123	ENSG00000152558.14	166.219	67.311	1.292	3.56e-94
KNOP1	ENSG00000103550.13	21.295	8.11	1.291	8.93e-125
IGKV2D-30	ENSG00000239571.1	2.255	0.33	1.291	1.8e-31
LSM5	ENSG00000106355.9	80.615	32.381	1.29	7.84e-151
STON2	ENSG00000140022.9	12.985	4.72	1.29	7.68e-49
RP4-706A16.3	ENSG00000226084.5	60.719	24.255	1.289	9.99e-61
TMEM189	ENSG00000240849.10	79.55	31.97	1.289	3.01e-116
C1orf74	ENSG00000162757.4	3.86	0.99	1.288	9.9e-152
MRPL35	ENSG00000132313.14	32.666	12.79	1.288	7.96e-152
WDR53	ENSG00000185798.7	19.129	7.25	1.287	2.36e-139
MRPS35	ENSG00000061794.12	48.706	19.385	1.286	8.04e-136
RP11-651P23.4	ENSG00000224831.3	9.985	3.505	1.286	1.04e-117
Z83851.4	ENSG00000233903.2	2.34	0.37	1.286	6.67e-152
SMS	ENSG00000102172.15	91.826	37.104	1.285	6.12e-102
CDH8	ENSG00000150394.13	1.825	0.16	1.284	6.47e-98
PAX6	ENSG00000007372.20	2.385	0.39	1.284	6.74e-57
LRP8	ENSG00000157193.14	9.62	3.36	1.284	1.57e-65
CYCS	ENSG00000172115.8	123.22	50.059	1.283	6.09e-117
CD276	ENSG00000103855.17	92.279	37.356	1.282	3.14e-104
TMEM99	ENSG00000167920.8	25.6	9.96	1.279	1.79e-111
NDUFS6	ENSG00000145494.11	98.07	39.871	1.277	2.77e-127
RTN4R	ENSG00000040608.13	7.985	2.71	1.276	1.96e-86
AMACR	ENSG00000242110.7	11.755	4.27	1.275	1.56e-92
MSI1	ENSG00000135097.6	2.46	0.43	1.275	1.5e-61
GALNT1	ENSG00000141429.13	45.526	18.22	1.275	2.03e-106
BCL2L10	ENSG00000137875.4	1.515	0.04	1.274	1.09e-114
RAB25	ENSG00000132698.13	124.456	50.876	1.274	2.29e-95
SUMO1P3	ENSG00000235082.2	4.975	1.47	1.274	2.33e-81
CSTF2	ENSG00000101811.13	16.52	6.255	1.272	2.74e-152
EIF6	ENSG00000242372.6	213.767	87.93	1.272	5.1e-145
RPA3	ENSG00000106399.11	44.856	18.01	1.27	5.1e-135
ANKEF1	ENSG00000132623.15	4.06	1.1	1.269	9.94e-134
C15orf41	ENSG00000186073.11	6.71	2.2	1.269	4.83e-135
C3orf14	ENSG00000114405.10	18.99	7.295	1.269	1.67e-58
POP7	ENSG00000172336.4	52.841	21.34	1.269	2.16e-156
UQCRH	ENSG00000173660.11	385.89	159.52	1.269	2.57e-154
IGKV1D-8	ENSG00000239819.2	1.82	0.17	1.269	6.58e-50
MSMB	ENSG00000263639.5	4.165	1.145	1.268	3.93e-7
MAFG-AS1	ENSG00000265688.1	5.215	1.58	1.268	3.49e-104
BCL2L12	ENSG00000126453.9	33.225	13.225	1.267	2.47e-143
CALML3-AS1	ENSG00000205488.8	1.43	0.01	1.267	2.16e-113
MCM3	ENSG00000112118.17	57.97	23.515	1.266	2.04e-109
LYPLA1	ENSG00000120992.17	54.5	22.1	1.265	4.81e-120
ULBP2	ENSG00000131015.4	9.235	3.26	1.265	5.2e-44
PABPC1	ENSG00000070756.13	1445.25	601.115	1.264	5.74e-108
GAREML	ENSG00000157833.12	4.02	1.09	1.264	8.49e-98
FAM103A1	ENSG00000169612.3	25.93	10.21	1.264	5.73e-165
NR2C2AP	ENSG00000184162.14	30.24	12.01	1.264	1.11e-138
TFDP2	ENSG00000114126.17	24.775	9.75	1.262	5.7e-105
PARP1	ENSG00000143799.12	75.735	31.004	1.262	3.68e-125
ARHGEF4	ENSG00000136002.16	16.28	6.21	1.261	4.97e-36
ME1	ENSG00000065833.8	18.543	7.155	1.261	1.25e-49
NREP	ENSG00000134986.13	34.324	13.74	1.261	8.58e-54
FANCD2	ENSG00000144554.10	11.03	4.02	1.261	4.9e-113
YARS2	ENSG00000139131.12	22.309	8.73	1.26	6.93e-155
GJB7	ENSG00000164411.10	1.73	0.14	1.26	7.44e-84
CCNE2	ENSG00000175305.16	4.88	1.46	1.257	6.49e-111
CTA-293F17.1	ENSG00000271133.5	3.325	0.81	1.257	1.44e-102
PRPF19	ENSG00000110107.8	99.325	40.985	1.257	9e-155
SCG5	ENSG00000166922.8	3.255	0.78	1.257	6.24e-72
RASSF6	ENSG00000169435.13	3.205	0.76	1.257	8.57e-81
DHCR7	ENSG00000172893.15	58.695	23.995	1.256	6.03e-69
FBXO5	ENSG00000112029.9	7.695	2.64	1.256	2.32e-144
RPL35P5	ENSG00000225573.4	8.3	2.895	1.256	5.39e-83
PPIF	ENSG00000108179.13	69.225	28.43	1.255	7.47e-102
ZDHHC13	ENSG00000177054.13	14.46	5.48	1.255	1.59e-129
FGFR2	ENSG00000066468.20	27.125	10.79	1.254	8.22e-38
APOA1BP	ENSG00000163382.11	134.965	56.061	1.253	8.64e-141
MRPL15	ENSG00000137547.8	58.086	23.784	1.253	7.79e-137
TRUB1	ENSG00000165832.5	10.69	3.905	1.253	4.33e-159
RFWD3	ENSG00000168411.13	15.04	5.73	1.253	1.23e-141
ATP11B	ENSG00000058063.15	36.146	14.595	1.252	7.05e-74
FAM210A	ENSG00000177150.12	11.48	4.24	1.252	3.21e-107
IGLV8-61	ENSG00000211638.2	19.56	7.63	1.252	5.98e-14
SPRR2G	ENSG00000159516.8	1.64	0.11	1.25	1.48e-47
LCLAT1	ENSG00000172954.13	9.19	3.285	1.25	2.83e-140
TFAP4	ENSG00000090447.11	13.275	5.01	1.248	2.42e-127
FBXO22	ENSG00000167196.13	23.4	9.275	1.248	4.72e-141
RP13-582O9.7	ENSG00000272172.1	1.375	0	1.248	5.54e-29
FAM131C	ENSG00000185519.8	1.49	0.05	1.246	1.87e-130
SLC38A1	ENSG00000111371.15	27.03	10.83	1.245	1.57e-93
FANCE	ENSG00000112039.3	11.255	4.17	1.245	2.69e-109
CTB-113P19.4	ENSG00000260581.1	1.605	0.1	1.244	1.08e-79
SRXN1	ENSG00000271303.1	48.331	19.83	1.244	1.88e-50
ATP1B1	ENSG00000143153.12	137.205	57.386	1.243	8.28e-56
SPINT1	ENSG00000166145.14	133.024	55.614	1.243	3.32e-106
ADM2	ENSG00000128165.8	2.69	0.56	1.242	3.6e-78
PDIA6	ENSG00000143870.12	256.31	107.82	1.242	3.67e-113
TMEM206	ENSG00000065600.12	11.565	4.315	1.241	1.1e-128
TMPO	ENSG00000120802.13	44.581	18.3	1.24	5.02e-111
PAK1IP1	ENSG00000111845.4	19.545	7.71	1.238	4.37e-121
SPINK5	ENSG00000133710.15	4.95	1.525	1.237	6.97e-50
MRPL11	ENSG00000174547.13	79.448	33.14	1.237	2.74e-146
HIST2H4A	ENSG00000270882.2	15.53	6.015	1.237	6.67e-63
ARL6IP1	ENSG00000170540.14	133.162	55.941	1.236	4.61e-134
TMEM41A	ENSG00000163900.10	32.045	13.03	1.236	1.24e-109
ASUN	ENSG00000064102.14	23.51	9.415	1.235	8.53e-142
PHF5A	ENSG00000100410.7	58.84	24.43	1.235	5.27e-148
XDH	ENSG00000158125.9	1.59	0.1	1.235	2.52e-102
VTA1	ENSG00000009844.15	37.4	15.325	1.234	2.5e-151
CMB9-22P13.1	ENSG00000173727.11	4.065	1.155	1.233	5.3e-92
LRRC8E	ENSG00000171017.10	5.675	1.84	1.233	1.42e-81
PUS7	ENSG00000091127.13	13.66	5.24	1.232	7.18e-106
PCDH19	ENSG00000165194.14	1.63	0.12	1.232	1.86e-63
UGT1A1	ENSG00000241635.7	1.36	0.005	1.232	1.04e-77
TINCR	ENSG00000223573.6	5.015	1.565	1.23	8.2e-47
CLNS1A	ENSG00000074201.8	119.349	50.334	1.229	1.72e-147
TUBG1	ENSG00000131462.7	51.369	21.35	1.228	1.53e-121
FAM72B	ENSG00000188610.12	3.4	0.88	1.227	4.64e-125
AL589743.1	ENSG00000279508.1	2.765	0.61	1.226	1.08e-55
CTD-2619J13.13	ENSG00000268307.1	2.415	0.46	1.226	8.92e-64
IGHV3-66	ENSG00000211972.2	6.195	2.08	1.224	2.15e-19
LINC01232	ENSG00000280734.2	3.32	0.85	1.224	3.15e-115
APOBEC3C	ENSG00000244509.3	34.195	14.075	1.223	8.22e-91
GM2A	ENSG00000196743.8	56.885	23.821	1.222	5.65e-89
RCN2	ENSG00000117906.13	77.377	32.615	1.221	1.12e-112
LINC00649	ENSG00000237945.7	4.845	1.51	1.22	7.44e-111
C5orf46	ENSG00000178776.4	1.71	0.165	1.218	2.26e-66
PNPLA4	ENSG00000006757.11	18.825	7.52	1.218	2.2e-98
CSNK2A1	ENSG00000101266.16	59.28	24.931	1.217	4.19e-124
SNRPD2	ENSG00000125743.10	425.804	182.638	1.217	3.28e-140
C20orf24	ENSG00000101084.16	176.02	75.204	1.216	1.99e-99
STEAP1B	ENSG00000105889.14	2.415	0.47	1.216	1.86e-64
KPNA4	ENSG00000186432.8	27.751	11.38	1.216	4.75e-132
MZT1	ENSG00000204899.5	15.765	6.22	1.215	1.12e-131
IGHV3-20	ENSG00000211946.3	2.795	0.635	1.215	5.63e-25
ILDR1	ENSG00000145103.12	5.61	1.85	1.214	6.5e-78
MAGEF1	ENSG00000177383.4	55.485	23.355	1.214	9.6e-87
TBC1D7	ENSG00000145979.17	27.905	11.465	1.213	1.9e-130
TOMM40	ENSG00000130204.12	68.426	28.969	1.212	7.41e-110
FAM220A	ENSG00000178397.12	17.115	6.82	1.212	1.47e-159
HOXC8	ENSG00000037965.5	1.475	0.07	1.21	1.27e-85
HOMER2	ENSG00000103942.12	13.18	5.13	1.21	1.93e-57
ATP5J2	ENSG00000241468.7	668.344	288.583	1.209	5.83e-129
DENR	ENSG00000139726.10	40.17	16.805	1.209	1.29e-163
MPP6	ENSG00000105926.15	5.925	1.995	1.209	1.31e-84
TBL1XR1	ENSG00000177565.15	55.151	23.29	1.209	2.9e-97
DNAJC19	ENSG00000205981.6	55.205	23.325	1.208	2.35e-105
RAC1P2	ENSG00000249936.3	17.535	7.025	1.208	1.74e-76
KIF20B	ENSG00000138182.14	3.72	1.045	1.207	7.15e-153
H1F0	ENSG00000189060.5	159.724	68.614	1.207	1.03e-62
UBE2MP1	ENSG00000261461.1	2.37	0.46	1.207	4.05e-126
LINC00925	ENSG00000255571.6	1.815	0.22	1.206	1.31e-86
RPL41	ENSG00000279483.1	4281.2	1855.7	1.206	8.6e-101
GSTP1	ENSG00000084207.15	1266.87	548.785	1.205	5.41e-85
SNRNP25	ENSG00000161981.10	39.795	16.7	1.205	5.65e-130
CENPQ	ENSG00000031691.6	7.25	2.58	1.204	2.89e-132
DLEU1	ENSG00000176124.11	8.72	3.22	1.204	5.29e-147
NAA20	ENSG00000173418.11	106.137	45.49	1.204	6.67e-117
SLITRK6	ENSG00000184564.8	2.685	0.6	1.204	3.58e-32
PIGU	ENSG00000101464.10	28.546	11.835	1.203	1.5e-160
RP11-360L9.7	ENSG00000253174.2	2.155	0.37	1.203	3.18e-113
MTHFD2	ENSG00000065911.11	80.4	34.39	1.202	1.88e-65
UQCC3	ENSG00000204922.4	14.81	5.87	1.202	8.56e-140
FZD7	ENSG00000155760.2	14.48	5.74	1.2	1.18e-45
AC010894.3	ENSG00000226853.2	3.63	1.02	1.197	3.49e-126
UBE2V2	ENSG00000169139.11	56.94	24.285	1.196	3.92e-151
PGAM1	ENSG00000171314.8	309.446	134.647	1.194	5.76e-116
CRIPT	ENSG00000119878.5	14.81	5.915	1.193	2.01e-150
P4HA1	ENSG00000122884.12	50.275	21.435	1.193	6.96e-78
NDUFB9	ENSG00000147684.7	336.496	146.58	1.193	1.28e-126
PTMAP5	ENSG00000214182.5	9.47	3.58	1.193	2.54e-55
RP11-498C9.2	ENSG00000262831.1	3.115	0.8	1.193	5.96e-33
ALDOA	ENSG00000149925.16	1871.79	818.505	1.192	2.21e-99
RPL35A	ENSG00000182899.14	2436.51	1065.75	1.192	1.05e-104
MRTO4	ENSG00000053372.4	29.63	12.42	1.191	3.94e-111
SMIM15	ENSG00000188725.7	33.43	14.08	1.191	3.7e-121
DMRTA2	ENSG00000142700.11	1.305	0.01	1.19	1.43e-77
FHL2	ENSG00000115641.18	35.309	14.915	1.19	8.25e-38
SLAMF9	ENSG00000162723.9	1.83	0.24	1.19	9.43e-72
SSR1	ENSG00000124783.12	87.114	37.639	1.189	7.31e-110
GAMT	ENSG00000130005.11	20.031	8.225	1.189	1.61e-49
PAK2	ENSG00000180370.10	47.019	20.06	1.189	9.35e-109
AC009299.3	ENSG00000227403.1	4.455	1.395	1.188	1.69e-43
GRTP1	ENSG00000139835.13	13.305	5.28	1.188	3.87e-78
SLC7A11	ENSG00000151012.13	3.785	1.1	1.188	1.08e-40
CBX1	ENSG00000108468.14	59.699	25.68	1.186	1.89e-104
RP1-278O22.1	ENSG00000224961.1	1.685	0.18	1.186	3.66e-74
FYTTD1	ENSG00000122068.12	36.76	15.62	1.184	7.67e-90
PTENP1	ENSG00000237984.3	3.61	1.03	1.183	9.03e-78
PDCD6	ENSG00000249915.7	171.86	75.149	1.183	9.2e-139
METAP1	ENSG00000164024.11	40.095	17.11	1.182	9.12e-128
GLRX3	ENSG00000108010.11	91.11	39.611	1.181	5.24e-120
ATP5J2-PTCD1	ENSG00000248919.7	6.105	2.135	1.18	1.5e-123
RNF7	ENSG00000114125.13	149.577	65.475	1.18	3.59e-129
UBE2N	ENSG00000177889.9	114.455	49.95	1.18	1.22e-135
KRT23	ENSG00000108244.16	3.19	0.85	1.179	1.47e-36
UCHL3	ENSG00000118939.17	43.051	18.46	1.179	9.96e-125
TYMSOS	ENSG00000176912.3	1.74	0.21	1.179	8.13e-124
LSM4	ENSG00000130520.10	160.574	70.426	1.178	2.86e-117
FABP6	ENSG00000170231.15	4.635	1.49	1.178	2.07e-13
CYC1	ENSG00000179091.4	162.05	71.1	1.177	1.07e-119
HPDL	ENSG00000186603.5	1.815	0.245	1.177	2.42e-81
B4GALT2	ENSG00000117411.16	48.2	20.78	1.176	4.19e-100
HACD3	ENSG00000074696.12	46.579	20.06	1.176	4.31e-115
SNRPF	ENSG00000139343.10	50.46	21.775	1.176	9.94e-135
USH1G	ENSG00000182040.8	1.26	0	1.176	1.78e-99
MAGEA6	ENSG00000197172.10	1.259	0	1.176	4.82e-60
AIMP2	ENSG00000106305.9	31.975	13.614	1.174	8.04e-102
TDP1	ENSG00000042088.13	10.335	4.025	1.174	8.6e-152
GCAT	ENSG00000100116.16	15.145	6.155	1.174	1.01e-78
NTPCR	ENSG00000135778.11	67.211	29.26	1.173	3.52e-109
MUC20	ENSG00000176945.16	22.265	9.32	1.173	7.83e-23
TUBB2B	ENSG00000137285.9	4.21	1.315	1.17	1.9e-42
NHLRC1	ENSG00000187566.4	3.19	0.865	1.168	6.69e-93
AC007879.7	ENSG00000229647.1	2.13	0.395	1.166	1.29e-81
PHLDA2	ENSG00000181649.5	16.045	6.595	1.166	4.04e-43
FABP5P7	ENSG00000234964.4	177.293	78.473	1.166	4.79e-41
LHX2	ENSG00000106689.10	1.31	0.03	1.165	2.39e-72
KLK13	ENSG00000167759.12	2.105	0.385	1.165	1.68e-36
RPPH1	ENSG00000277209.1	8.395	3.19	1.165	6.34e-27
BOLA2	ENSG00000183336.7	16.49	6.81	1.163	5.03e-85
NDFIP2	ENSG00000102471.13	26.91	11.46	1.163	2.13e-94
SLC1A5	ENSG00000105281.12	152.778	67.669	1.163	1.01e-80
UGT1A3	ENSG00000243135.5	1.24	0	1.163	5.99e-77
TXN	ENSG00000136810.12	392.976	175.046	1.162	1.55e-69
MTFP1	ENSG00000242114.5	27.71	11.83	1.162	1.61e-78
TFDP1	ENSG00000198176.12	57.579	25.205	1.161	7.19e-112
FAM117B	ENSG00000138439.11	6.785	2.485	1.16	1.09e-80
ILF2	ENSG00000143621.16	207.36	92.27	1.16	2.7e-131
MRPS23	ENSG00000181610.12	58.814	25.775	1.16	2.73e-120
THY1	ENSG00000154096.13	61.697	27.075	1.159	3.11e-27
NIPAL1	ENSG00000163293.11	2.305	0.48	1.159	1.72e-118
SET	ENSG00000119335.16	267.416	119.282	1.158	1.33e-109
ZNF185	ENSG00000147394.18	17.59	7.33	1.158	9.66e-61
GEMIN6	ENSG00000152147.10	12.965	5.26	1.158	8.17e-130
IKBKE	ENSG00000263528.7	10.45	4.13	1.158	8.16e-84
TACC3	ENSG00000013810.18	32.255	13.91	1.157	1.23e-80
RRS1	ENSG00000179041.3	21.995	9.31	1.157	1.47e-73
RP11-83M16.4	ENSG00000249721.1	1.43	0.09	1.157	3.07e-59
PCDH7	ENSG00000169851.15	4.905	1.65	1.156	3.01e-41
C6orf183	ENSG00000243587.6	1.525	0.135	1.154	1.23e-103
FEZF1	ENSG00000128610.11	1.27	0.02	1.154	7.37e-70
MAP7D2	ENSG00000184368.15	1.76	0.24	1.154	9.39e-65
C1QBP	ENSG00000108561.8	137.586	61.339	1.153	9.04e-94
CYB5R2	ENSG00000166394.14	32.089	13.88	1.153	1.03e-38
SLMO2	ENSG00000101166.15	53.772	23.635	1.153	2.93e-129
DPH6	ENSG00000134146.11	13.82	5.67	1.152	3.59e-109
CTD-2325P2.4	ENSG00000259038.1	1.22	0	1.151	7.22e-37
E2F2	ENSG00000007968.6	2.53	0.59	1.151	2.32e-104
INTS7	ENSG00000143493.12	14.155	5.825	1.151	3.1e-143
GJA1	ENSG00000152661.7	117.282	52.279	1.151	3.4e-27
HMCES	ENSG00000183624.13	63.899	28.225	1.151	4.03e-133
AC006011.4	ENSG00000244563.1	14.245	5.88	1.148	1.13e-95
SUB1	ENSG00000113387.11	285.104	128.079	1.148	1.88e-106
MRPS17	ENSG00000239789.5	18.235	7.68	1.148	1.39e-110
RP11-483F11.7	ENSG00000229278.1	1.215	0	1.147	2.73e-83
TBX18	ENSG00000112837.16	1.7	0.22	1.146	2.81e-48
KREMEN1	ENSG00000183762.12	25.825	11.125	1.146	5.33e-51
CTC-429P9.4	ENSG00000268790.5	9.18	3.605	1.145	6.43e-25
DPY30	ENSG00000162961.13	101.307	45.255	1.145	2.46e-149
BOP1	ENSG00000261236.5	44.475	19.58	1.144	5.16e-79
H2AFV	ENSG00000105968.18	184.272	82.819	1.144	1.18e-137
SMARCB1	ENSG00000099956.17	86.704	38.715	1.143	1.59e-128
PDZD11	ENSG00000120509.10	55.925	24.78	1.143	2.37e-157
TCF20	ENSG00000100207.18	20.23	8.62	1.142	1.09e-93
CARD14	ENSG00000141527.16	3.23	0.92	1.14	4.56e-84
COA7	ENSG00000162377.5	9.73	3.87	1.14	1.27e-120
KIAA1522	ENSG00000162522.10	47.775	21.13	1.14	2.98e-92
FAM173B	ENSG00000150756.13	13.235	5.465	1.139	1.42e-112
PTRH2	ENSG00000141378.14	30.32	13.23	1.138	2.1e-106
TSFM	ENSG00000123297.16	38.86	17.13	1.137	4.25e-141
SOX12	ENSG00000177732.7	9.4	3.73	1.137	6.32e-81
CILP2	ENSG00000160161.9	1.725	0.24	1.136	3.6e-70
XXbac-BPG246D15.9	ENSG00000250264.1	4.32	1.42	1.136	6.72e-41
C17orf89	ENSG00000224877.3	79.53	35.666	1.135	7.9e-103
CPSF3	ENSG00000119203.13	32.009	14.03	1.135	1.46e-149
THNSL1	ENSG00000185875.12	3.555	1.075	1.134	2.07e-138
RP11-229P13.23	ENSG00000231864.2	1.195	0	1.134	1.71e-76
DARS-AS1	ENSG00000231890.7	3.87	1.22	1.133	4.61e-108
C17orf96	ENSG00000273604.1	3.45	1.03	1.132	5.13e-85
POLD2	ENSG00000106628.10	110.533	49.905	1.132	4.66e-105
MAL2	ENSG00000147676.13	102.842	46.375	1.132	3.37e-48
TNC	ENSG00000041982.14	71.256	31.981	1.131	2.56e-12
TMED2	ENSG00000086598.10	175.38	79.599	1.13	4.8e-121
RIMS2	ENSG00000176406.20	1.32	0.06	1.13	4.02e-81
APOO	ENSG00000184831.13	24.39	10.605	1.129	1.08e-112
EEF1A1P9	ENSG00000249264.1	1.8	0.28	1.129	1.35e-125
IGF2BP2	ENSG00000073792.15	27.734	12.14	1.129	4.95e-18
GRIP1	ENSG00000155974.11	2.05	0.395	1.129	1.37e-82
PES1	ENSG00000100029.17	77.907	35.095	1.128	2.35e-108
YWHAG	ENSG00000170027.6	105.189	47.589	1.128	7.92e-103
UQCRFS1P1	ENSG00000226085.3	3.755	1.175	1.128	1.59e-56
DIAPH3	ENSG00000139734.17	2.93	0.8	1.127	1.17e-108
PLP2	ENSG00000102007.10	283.105	129.122	1.127	9.68e-84
RP11-9E17.1	ENSG00000277534.1	2.155	0.445	1.127	2.15e-101
GPX7	ENSG00000116157.5	18	7.705	1.126	2.12e-48
GAD1	ENSG00000128683.13	1.87	0.315	1.126	2.34e-63
TDO2	ENSG00000151790.8	4.935	1.72	1.126	1.51e-27
FLAD1	ENSG00000160688.18	47.689	21.325	1.125	1.04e-134
STARD5	ENSG00000172345.13	14.04	5.895	1.125	1.46e-65
RP11-138I1.4	ENSG00000265401.1	129.301	58.726	1.125	1.18e-46
AC009264.1	ENSG00000234352.9	1.18	0	1.124	1.45e-92
TMEM184A	ENSG00000164855.15	8.065	3.16	1.124	7.93e-35
H3F3AP4	ENSG00000235655.3	332.785	152.402	1.122	1.24e-82
CSAG3	ENSG00000268916.5	1.175	0	1.121	5.96e-57
TSSC1	ENSG00000032389.12	27.495	12.1	1.121	2.38e-150
PRTFDC1	ENSG00000099256.18	8.71	3.465	1.121	1.98e-63
IGKV6D-21	ENSG00000225523.2	3.34	0.995	1.121	1.42e-20
FBN2	ENSG00000138829.10	1.63	0.21	1.12	5.95e-51
ABCC1	ENSG00000103222.18	41.671	18.64	1.119	8.21e-50
KRT31	ENSG00000094796.4	1.215	0.02	1.119	1.31e-50
KIF26B	ENSG00000162849.15	2.78	0.74	1.119	3.14e-57
RUVBL2	ENSG00000183207.12	89.747	40.795	1.119	4.24e-108
RMRP	ENSG00000277027.1	10.47	4.28	1.119	1.63e-16
CTD-2523D13.2	ENSG00000254854.1	1.17	0	1.118	9.36e-111
AIM2	ENSG00000163568.13	4.185	1.39	1.117	1.72e-42
CCT7	ENSG00000135624.15	215.328	98.704	1.117	1.2e-129
SAC3D1	ENSG00000168061.13	14.21	6.015	1.117	1.4e-112
PP7080	ENSG00000188242.4	24.77	10.88	1.117	2.13e-92
GPN1	ENSG00000198522.13	47.295	21.265	1.117	6.2e-156
RP11-314A20.1	ENSG00000213939.4	2.265	0.505	1.117	5.7e-109
CORO2A	ENSG00000106789.12	13.34	5.615	1.116	5.36e-84
NOL10	ENSG00000115761.15	21.76	9.5	1.116	1.74e-132
ZACN	ENSG00000186919.12	7.13	2.75	1.116	4.1e-13
SLC39A4	ENSG00000147804.9	59.02	26.715	1.115	8.65e-76
PSMG1	ENSG00000183527.11	52.585	23.735	1.115	1.18e-108
C7orf73	ENSG00000243317.7	41.75	18.745	1.114	3.09e-129
LOXL1	ENSG00000129038.15	45.97	20.695	1.114	3.94e-48
UCHL5	ENSG00000116750.13	27.75	12.295	1.113	3.4e-135
SGPL1	ENSG00000166224.16	25.235	11.13	1.113	7.94e-141
BAG4	ENSG00000156735.10	10.435	4.29	1.112	1.6e-89
RPL37	ENSG00000145592.13	2824.15	1306.01	1.112	4.41e-101
PRMT3	ENSG00000185238.12	11.505	4.785	1.112	1.31e-119
RP11-44F14.2	ENSG00000261804.1	2.005	0.39	1.112	2.01e-65
PIR	ENSG00000087842.10	40.126	18.045	1.111	9.97e-38
DPP3	ENSG00000254986.7	48.15	21.77	1.11	3.14e-118
RPL22L1	ENSG00000163584.17	112.657	51.646	1.11	6.84e-64
BANF1	ENSG00000175334.7	244.653	112.903	1.109	1.33e-125
CNIH1	ENSG00000100528.11	113.197	51.996	1.108	3.26e-86
NDUFB4	ENSG00000065518.7	262.231	121.132	1.108	4.49e-127
ORC5	ENSG00000164815.10	15.995	6.885	1.108	1.4e-131
RFC3	ENSG00000133119.12	10.42	4.3	1.107	1.78e-108
HSPD1	ENSG00000144381.16	246.312	113.783	1.107	2.58e-49
LSM12	ENSG00000161654.9	40.68	18.35	1.107	5.42e-139
ACOT7	ENSG00000097021.19	44.355	20.075	1.106	1.22e-96
AC006116.20	ENSG00000267710.5	3.42	1.055	1.105	4.14e-38
ALG10	ENSG00000139133.6	4.205	1.42	1.105	3.28e-136
PRKCI	ENSG00000163558.12	29.24	13.055	1.105	6.66e-84
MTCL1	ENSG00000168502.17	6.53	2.5	1.105	5.64e-52
BPHL	ENSG00000137274.12	19.395	8.49	1.104	3.38e-103
FOXP3	ENSG00000049768.14	2.225	0.5	1.104	4.39e-97
HIST1H2AE	ENSG00000277075.1	5.06	1.82	1.104	6.32e-11
ARL4C	ENSG00000188042.7	35.349	15.925	1.103	6.55e-66
GOT2	ENSG00000125166.12	65.869	30.13	1.103	6.12e-122
POLR2H	ENSG00000163882.9	142.858	66.015	1.102	5.03e-92
H2AFZ	ENSG00000164032.11	346.965	161.081	1.102	1.78e-105
RP11-796E10.1	ENSG00000270460.1	1.145	0	1.101	2.19e-124
RNF187	ENSG00000168159.10	76.984	35.39	1.1	6.4e-134
NIPAL4	ENSG00000172548.14	1.7	0.26	1.1	4.62e-41
CREG2	ENSG00000175874.9	1.335	0.09	1.099	6.93e-83
MAP6D1	ENSG00000180834.7	3.54	1.12	1.099	5.69e-84
HDAC2	ENSG00000196591.11	89.84	41.396	1.099	1.03e-109
RASSF9	ENSG00000198774.4	5.085	1.84	1.099	3.88e-33
GALNT7	ENSG00000109586.11	14.63	6.3	1.098	4.85e-91
ZNF639	ENSG00000121864.9	43.395	19.744	1.098	1.12e-83
STEAP1	ENSG00000164647.8	24.54	10.93	1.098	5.76e-31
HYLS1	ENSG00000198331.10	4.545	1.59	1.098	2.41e-117
TUSC3	ENSG00000104723.20	58.641	26.875	1.097	8.92e-38
LRRC4	ENSG00000128594.7	5.215	1.905	1.097	1.43e-26
HDGF	ENSG00000143321.18	288.094	134.191	1.097	3.35e-95
LINC01234	ENSG00000249550.6	1.16	0.01	1.097	1.39e-64
MRPL51	ENSG00000111639.7	190.334	88.489	1.096	3.39e-129
RWDD4P2	ENSG00000175741.5	4.92	1.77	1.096	8.16e-119
PGBD5	ENSG00000177614.9	3.435	1.075	1.096	4.95e-46
CISD2	ENSG00000145354.9	26.369	11.815	1.095	8.7e-119
CTA-989H11.1	ENSG00000273366.1	1.69	0.26	1.094	1.95e-126
STYXL1	ENSG00000127952.16	49.76	22.785	1.094	1.72e-102
SUMO2	ENSG00000188612.11	369.645	172.654	1.094	5.46e-130
HIST1H2BK	ENSG00000197903.7	114.976	53.345	1.094	4.12e-48
GTF2H3	ENSG00000111358.13	18.865	8.31	1.093	6.52e-126
ZC3H8	ENSG00000144161.12	9.63	3.985	1.092	8.97e-111
IGHM	ENSG00000211899.7	239.834	111.96	1.092	1.01e-8
COX6B1	ENSG00000126267.8	394.176	184.572	1.091	1.03e-121
DRG1	ENSG00000185721.11	68.27	31.519	1.091	4.43e-124
TRUB2	ENSG00000167112.9	24.406	10.93	1.091	4.54e-128
TMEM45A	ENSG00000181458.10	32.669	14.81	1.091	9.51e-39
GAPDHP1	ENSG00000228232.1	2.505	0.645	1.091	1.52e-110
SENP2	ENSG00000163904.12	28.709	12.96	1.09	8.39e-78
ELOVL4	ENSG00000118402.5	1.745	0.29	1.089	1.29e-81
RPAP3	ENSG00000005175.9	20.624	9.165	1.089	3.66e-143
PSMD10	ENSG00000101843.18	57.513	26.5	1.089	1.37e-120
TIMM10	ENSG00000134809.8	61.165	28.215	1.089	3.45e-116
B3GALNT2	ENSG00000162885.12	11.99	5.11	1.088	4.61e-85
TFAM	ENSG00000108064.10	19.301	8.55	1.088	9.15e-106
NUDT21	ENSG00000167005.13	51.613	23.745	1.088	9.32e-117
ZNF488	ENSG00000265763.3	1.36	0.11	1.088	6.66e-106
RPS10-NUDT3	ENSG00000270800.1	17.175	7.55	1.088	4.07e-70
AZIN1	ENSG00000155096.13	71.209	33	1.087	2.39e-99
SSBP1	ENSG00000106028.10	170.165	79.561	1.087	9.06e-126
HS6ST1	ENSG00000136720.6	40.696	18.635	1.087	1.41e-73
METTL2A	ENSG00000087995.15	16.18	7.095	1.086	1.84e-131
RPL8	ENSG00000161016.15	3262.36	1536.68	1.086	3.58e-99
PIGN	ENSG00000197563.9	11.44	4.86	1.086	7.41e-92
ZNF367	ENSG00000165244.6	3.35	1.05	1.085	7.08e-96
PGM2	ENSG00000169299.13	28.435	12.875	1.085	8.3e-85
BMPR1APS2	ENSG00000232460.4	1.385	0.125	1.084	1.02e-69
MYC	ENSG00000136997.14	79.853	37.14	1.084	2.24e-31
OLA1P1	ENSG00000213790.2	1.48	0.17	1.084	4.72e-217
AMTN	ENSG00000187689.9	1.245	0.06	1.083	9.1e-40
IMPACT	ENSG00000154059.9	17.745	7.85	1.083	3e-91
POLE3	ENSG00000148229.12	57.265	26.525	1.082	4.64e-121
SIPA1L3	ENSG00000105738.10	16.31	7.185	1.081	3.93e-60
RP11-657O9.1	ENSG00000240086.5	1.115	0	1.081	1.96e-84
IGKV2-30	ENSG00000243238.1	23.515	10.59	1.081	9.4e-11
TIMM23	ENSG00000265354.3	57.865	26.82	1.081	7.8e-137
WDR76	ENSG00000092470.11	6.42	2.51	1.08	8.48e-67
SNRPD3	ENSG00000100028.11	152.725	71.699	1.08	4.24e-119
HAMP	ENSG00000105697.7	2.795	0.795	1.08	1.86e-22
RALGPS2	ENSG00000116191.17	5.83	2.23	1.08	6.01e-83
KIAA1715	ENSG00000144320.13	11.265	4.8	1.08	5.89e-106
MDH2	ENSG00000146701.11	178.39	83.844	1.08	4.03e-114
FJX1	ENSG00000179431.6	6.83	2.705	1.08	1.91e-59
IGLC6	ENSG00000222037.5	1.895	0.37	1.079	2.61e-36
ARL4D	ENSG00000175906.4	25.639	11.62	1.078	4.09e-20
PPP2R3A	ENSG00000073711.10	5.755	2.2	1.078	3.19e-90
HOXD8	ENSG00000175879.8	2.715	0.76	1.078	2.74e-44
IRX4	ENSG00000113430.9	1.11	0	1.077	2.75e-59
FDXR	ENSG00000161513.11	17.99	8	1.077	2.8e-85
PC	ENSG00000173599.13	16.23	7.165	1.077	1.31e-61
L2HGDH	ENSG00000087299.11	3.995	1.37	1.076	4.37e-134
IL23A	ENSG00000110944.8	2.69	0.75	1.076	3.21e-58
SMUG1	ENSG00000123415.14	43.955	20.32	1.076	1.53e-142
TUBBP5	ENSG00000159247.12	3.405	1.09	1.076	2.32e-51
POLR1B	ENSG00000125630.15	10.79	4.6	1.074	7.96e-107
GEMIN8P4	ENSG00000228175.3	2.105	0.475	1.074	1.15e-132
ZNF436	ENSG00000125945.14	9.305	3.9	1.073	2.37e-80
DLG1	ENSG00000075711.20	45.155	20.95	1.072	2.74e-84
GSKIP	ENSG00000100744.14	16.075	7.12	1.072	2.17e-98
SLC2A5	ENSG00000142583.17	2.985	0.895	1.072	5.28e-65
MRPL24	ENSG00000143314.12	91.839	43.155	1.072	5.23e-107
TTC30B	ENSG00000196659.9	3.74	1.255	1.072	1.6e-97
PSMD12	ENSG00000197170.9	42.41	19.65	1.072	5.11e-102
CCL26	ENSG00000006606.8	3.465	1.125	1.071	2.12e-37
EXOSC3	ENSG00000107371.12	30.095	13.8	1.071	1.22e-106
MKKS	ENSG00000125863.17	28.779	13.17	1.071	2.97e-110
RPS7P1	ENSG00000263266.2	28.329	12.96	1.071	2.56e-44
FUT8	ENSG00000033170.16	19.48	8.755	1.07	2.64e-72
COMMD2	ENSG00000114744.8	33.02	15.21	1.069	2.09e-99
TNFRSF17	ENSG00000048462.10	2.64	0.735	1.069	4.52e-32
ATP6V1E2	ENSG00000250565.6	8.295	3.435	1.068	1.97e-85
TP53	ENSG00000141510.15	33.204	15.31	1.068	1.5e-32
RDH10	ENSG00000121039.9	31.989	14.744	1.067	6.5e-27
ALOX12P2	ENSG00000262943.7	3.89	1.335	1.066	2.14e-46
STEAP3	ENSG00000115107.19	19.345	8.72	1.066	3.08e-47
MTERF3	ENSG00000156469.8	24.18	11.025	1.066	7.02e-115
PPP1R14BP3	ENSG00000179967.11	9.215	3.88	1.066	7.4e-42
PPME1	ENSG00000214517.8	42.15	19.625	1.065	2.85e-105
CTC-499J9.1	ENSG00000248268.1	1.09	0	1.064	1.04e-112
PLXNB3	ENSG00000198753.11	8.71	3.645	1.064	1.4e-35
RP11-245D16.4	ENSG00000278238.1	2.325	0.59	1.064	1.78e-86
APEX2	ENSG00000169188.4	19.635	8.875	1.063	1.07e-140
GNPNAT1	ENSG00000100522.8	13.835	6.1	1.063	1.19e-95
RP11-452N17.1	ENSG00000277998.1	15.42	6.86	1.063	5.64e-33
ATP5L	ENSG00000167283.7	404.5	193.185	1.062	3.87e-112
ROMO1	ENSG00000125995.15	233.591	111.364	1.062	1.9e-94
RP11-396C23.2	ENSG00000225518.2	1.965	0.42	1.062	1.85e-88
LINC00665	ENSG00000232677.6	10.26	4.395	1.062	1.22e-21
HSPE1-MOB4	ENSG00000270757.1	7.45	3.05	1.061	1.04e-57
USP5	ENSG00000111667.13	57.869	27.23	1.06	2.56e-128
RNVU1-7	ENSG00000206585.1	1.084	0	1.06	0.00361
C5orf22	ENSG00000082213.17	17.53	7.895	1.059	7.11e-112
DTD2	ENSG00000129480.12	12.895	5.67	1.059	2.42e-91
MIR210HG	ENSG00000247095.2	14.77	6.57	1.059	2.45e-37
ISG20L2	ENSG00000143319.16	31.325	14.53	1.058	5.94e-112
TTF2	ENSG00000116830.11	13.56	6	1.057	4.49e-86
STAMBP	ENSG00000124356.15	44.815	21.025	1.057	5.61e-141
RPS3AP26	ENSG00000214389.2	16.12	7.235	1.056	8.42e-54
IL22RA1	ENSG00000142677.3	2.21	0.545	1.055	1.63e-63
SUV39H1	ENSG00000101945.16	7.89	3.285	1.053	1.05e-116
DNAJB11	ENSG00000090520.10	171.141	82.044	1.052	3.12e-102
SPAG4	ENSG00000061656.9	12.305	5.415	1.052	9.36e-43
ZNF503-AS2	ENSG00000237149.5	5.115	1.95	1.052	7.72e-77
ATP5G3	ENSG00000154518.9	317.86	152.868	1.051	1.58e-93
EDN2	ENSG00000127129.9	2.73	0.8	1.051	4.27e-16
TSN	ENSG00000211460.11	43.609	20.535	1.051	7.35e-131
ZNF812	ENSG00000224689.7	2.045	0.47	1.051	2.07e-44
ADGRG1	ENSG00000205336.11	84.062	40.084	1.05	3.73e-40
LYPD1	ENSG00000150551.10	2.83	0.85	1.05	8.69e-49
TMEM68	ENSG00000167904.14	16.325	7.365	1.05	3.84e-119
SLC35G1	ENSG00000176273.14	4.965	1.88	1.05	1.57e-61
RP11-316M1.12	ENSG00000259357.2	2.445	0.665	1.049	2.06e-26
ASIC1	ENSG00000110881.11	2.495	0.69	1.048	2.47e-68
RP11-465N4.4	ENSG00000234678.1	5.255	2.025	1.048	4.13e-68
TBCCD1	ENSG00000113838.12	13.525	6.03	1.047	2.31e-104
WDYHV1	ENSG00000156795.6	19.975	9.15	1.047	7.45e-126
PRRX2	ENSG00000167157.10	6.75	2.75	1.047	2.86e-25
STRBP	ENSG00000165209.18	15.87	7.17	1.046	5.35e-78
FARSB	ENSG00000116120.9	19.835	9.1	1.045	1.06e-111
APOC2	ENSG00000234906.8	5.225	2.02	1.044	1.19e-15
TMEM38B	ENSG00000095209.11	9.195	3.945	1.044	1.8e-65
GCNT3	ENSG00000140297.12	1.68	0.3	1.044	8.28e-52
POLR3K	ENSG00000161980.5	17.78	8.11	1.044	6.74e-120
MARCKS	ENSG00000277443.1	67.716	32.316	1.044	3.47e-75
ANKH	ENSG00000154122.12	39.69	18.75	1.043	5.67e-43
CYP26A1	ENSG00000095596.11	1.265	0.1	1.042	5.58e-51
FAM136A	ENSG00000035141.7	36.77	17.345	1.042	2.67e-117
AC005336.4	ENSG00000267056.2	1.16	0.05	1.041	2.78e-53
CLDN16	ENSG00000113946.3	1.305	0.12	1.041	6.34e-56
FANCA	ENSG00000187741.14	17.165	7.83	1.041	2.84e-68
DSN1	ENSG00000149636.15	16.135	7.335	1.04	4.99e-108
MRPS16	ENSG00000182180.13	79.715	38.265	1.04	6.71e-125
DACT2	ENSG00000164488.11	2.34	0.625	1.039	1.15e-31
SLC25A39	ENSG00000013306.15	164.391	79.489	1.039	2.82e-110
C17orf75	ENSG00000108666.9	18.805	8.645	1.038	3.64e-99
TMEM254	ENSG00000133678.13	25	11.66	1.038	6.38e-103
PAIP1	ENSG00000172239.13	91.224	43.914	1.038	2.59e-108
CD109	ENSG00000156535.13	14.22	6.415	1.037	6.34e-33
YWHAQ	ENSG00000134308.13	276.655	134.335	1.037	6.43e-106
FAM207BP	ENSG00000228797.2	1.565	0.25	1.037	7.07e-148
MED20	ENSG00000124641.14	14.72	6.665	1.036	5.16e-126
PSME3	ENSG00000131467.10	78.729	37.869	1.036	1.25e-90
FANCF	ENSG00000183161.4	5.03	1.94	1.036	8.39e-117
CIART	ENSG00000159208.15	11.1	4.905	1.035	1.99e-27
RP11-776H12.1	ENSG00000226476.2	1.09	0.02	1.035	1.09e-140
PRDX2	ENSG00000167815.11	257.619	125.313	1.034	5.49e-70
GNB1L	ENSG00000185838.13	8.975	3.87	1.034	5.22e-89
DIP2B	ENSG00000066084.12	14.965	6.8	1.033	7.46e-81
GPD2	ENSG00000115159.15	20.03	9.275	1.033	5.93e-84
STAT1	ENSG00000115415.18	90.408	43.676	1.033	1.74e-46
PEX13	ENSG00000162928.8	19.455	8.995	1.033	2.32e-117
RNASE7	ENSG00000165799.4	1.19	0.07	1.033	2.3e-58
LYPD6	ENSG00000187123.14	1.435	0.19	1.033	8.65e-73
CHRNB4	ENSG00000117971.11	1.045	0	1.032	2.83e-111
MDH1	ENSG00000014641.17	173.296	84.22	1.032	9.14e-118
ERMP1	ENSG00000099219.13	17.39	7.995	1.032	2.69e-62
RIBC2	ENSG00000128408.8	2.21	0.57	1.032	7.97e-31
RARG	ENSG00000172819.16	37.71	17.925	1.032	8.88e-56
LTF	ENSG00000012223.12	28.984	13.677	1.031	1.52e-6
MRPL37	ENSG00000116221.15	72.7	35.055	1.031	1.05e-125
RRP7A	ENSG00000189306.10	35.74	16.979	1.031	1.48e-85
MAZ	ENSG00000103495.13	199.147	96.985	1.03	1.44e-110
PFDN2	ENSG00000143256.4	143.722	69.852	1.03	7.36e-85
XRCC6BP1	ENSG00000166896.7	10.08	4.425	1.03	5.66e-117
ARMC1	ENSG00000104442.9	19.54	9.065	1.029	1.32e-132
WNT4	ENSG00000162552.14	2.5	0.715	1.029	2.87e-55
RP11-27I1.4	ENSG00000214654.6	3.265	1.09	1.029	1.6e-84
RPLP0	ENSG00000089157.15	2931.35	1436.71	1.028	1.51e-86
HCAR2	ENSG00000182782.7	14.435	6.57	1.028	2.39e-18
COX7B	ENSG00000131174.4	156.964	76.51	1.027	1.23e-106
MTERF1	ENSG00000127989.13	9.41	4.11	1.027	9.04e-106
IGKV5-2	ENSG00000211599.2	2.82	0.875	1.027	4.16e-18
MYNN	ENSG00000085274.15	17.435	8.05	1.026	1.53e-94
SLC7A8	ENSG00000092068.18	48.74	23.43	1.026	1.29e-19
SKA2	ENSG00000182628.12	36.545	17.435	1.026	1.57e-94
AC068831.16	ENSG00000278514.1	1.035	0	1.025	4.2e-113
ARL6IP6	ENSG00000177917.10	29.045	13.76	1.025	1.74e-95
SMOX	ENSG00000088826.17	12.775	5.77	1.025	1.09e-67
GTF2A2	ENSG00000140307.10	124.896	60.854	1.025	1.36e-111
LIPT2	ENSG00000175536.6	3.57	1.245	1.025	5.82e-91
RP4-545L17.11	ENSG00000276026.1	1.035	0	1.025	3.24e-33
GSR	ENSG00000104687.12	41.871	20.08	1.024	1.33e-59
TRAPPC5	ENSG00000181029.8	75.95	36.835	1.024	1.19e-83
SNORD17	ENSG00000212232.1	3.28	1.105	1.024	8.34e-36
SYT1	ENSG00000067715.13	2.21	0.58	1.023	1.5e-65
NOL11	ENSG00000130935.9	36.955	17.68	1.023	2.48e-114
RCCD1	ENSG00000166965.12	11.53	5.165	1.023	1.17e-80
PMS2P1	ENSG00000078319.8	8.545	3.7	1.022	1.3e-130
TRMT5	ENSG00000126814.6	7.105	2.99	1.022	2.96e-120
MEMO1P1	ENSG00000226054.2	2.39	0.67	1.021	1.24e-166
RP11-499F3.2	ENSG00000259692.5	1.03	0	1.021	1.43e-102
RP11-49K24.6	ENSG00000267228.6	3.545	1.24	1.021	6.91e-16
ARHGEF39	ENSG00000137135.17	5.355	2.135	1.019	2.37e-67
IGHV4-28	ENSG00000211952.3	4.595	1.76	1.019	4.59e-20
PSMB3	ENSG00000277791.4	250.592	123.173	1.019	2.83e-105
SH3PXD2A-AS1	ENSG00000280693.2	1.3	0.135	1.019	5.38e-69
DNMT3B	ENSG00000088305.18	2.22	0.59	1.018	1.97e-86
MRPS34	ENSG00000074071.13	104.075	50.912	1.017	6.64e-125
ENAH	ENSG00000154380.16	55.591	26.99	1.016	1.86e-49
IGLV4-60	ENSG00000211639.2	4.045	1.495	1.016	2.35e-14
TIPIN	ENSG00000075131.9	8.46	3.68	1.015	1.07e-111
ZCRB1	ENSG00000139168.7	58.971	28.67	1.015	1.16e-132
FAM160A1	ENSG00000164142.15	3.275	1.115	1.015	7.57e-75
RP11-480I12.5	ENSG00000214796.8	2.84	0.9	1.015	6.34e-57
TMEM185B	ENSG00000226479.3	21.05	9.91	1.015	3.22e-91
SF3B6	ENSG00000115128.6	144.501	71.066	1.014	2.93e-131
HIST1H2BD	ENSG00000158373.8	24.07	11.419	1.013	7.2e-11
CKAP5	ENSG00000175216.14	39.356	19.01	1.012	3.89e-85
TLCD1	ENSG00000160606.10	19.35	9.09	1.012	4.69e-69
AC004967.7	ENSG00000243554.1	2.295	0.635	1.011	8.92e-109
PSMC4	ENSG00000013275.7	105.192	51.701	1.011	4.04e-91
ATF5	ENSG00000169136.8	38.525	18.64	1.009	5.13e-71
LSM7	ENSG00000130332.14	137.02	67.58	1.009	5.35e-96
TMEM30B	ENSG00000182107.6	15.9	7.4	1.009	1.39e-56
RP11-319G6.1	ENSG00000248932.5	3.65	1.31	1.009	3.27e-93
CCT6A	ENSG00000146731.10	183.418	90.672	1.008	8.23e-85
CLCN2	ENSG00000114859.14	7.065	3.01	1.008	4.49e-63
RBL1	ENSG00000080839.11	4.13	1.55	1.008	3.85e-122
PRMT6	ENSG00000198890.7	9.84	4.39	1.008	9.62e-85
C17orf58	ENSG00000186665.8	9.93	4.44	1.007	1.84e-114
CTC-518P12.6	ENSG00000267484.1	1.01	0	1.007	7.83e-65
RANGAP1	ENSG00000100401.19	74.405	36.559	1.005	5.05e-63
ITGA11	ENSG00000137809.16	3.795	1.39	1.005	1.73e-32
RP11-51O6.1	ENSG00000224631.4	47.5	23.165	1.005	6.84e-93
RBM8A	ENSG00000265241.6	180.18	89.263	1.005	1.21e-108
GSTZ1	ENSG00000100577.18	23.78	11.355	1.004	3.53e-92
PPM1G	ENSG00000115241.10	94.159	46.444	1.004	7.69e-127
GEN1	ENSG00000178295.14	5.145	2.065	1.004	5.25e-71
NUP62CL	ENSG00000198088.10	2.63	0.81	1.004	6.58e-66
TIMM8B	ENSG00000150779.11	67.794	33.33	1.003	2.34e-91
RPS7	ENSG00000171863.12	1679.83	837.908	1.003	3.25e-94
MAPK8IP2	ENSG00000008735.13	2.715	0.855	1.002	2.64e-56
POLB	ENSG00000070501.11	35.035	16.989	1.002	4.49e-73
TLDC1	ENSG00000140950.15	10.03	4.51	1.001	6.01e-72
MGRN1	ENSG00000102858.12	17.7	36.435	-1.001	1.1e-91
LINC01106	ENSG00000175772.10	3.755	8.515	-1.001	1.86e-45
RP11-1228E12.1	ENSG00000280279.1	3.895	8.795	-1.001	2e-38
ANKRD13A	ENSG00000076513.16	17.655	36.37	-1.002	1.36e-114
ANKRD13D	ENSG00000172932.14	28.32	57.721	-1.002	1.83e-48
CLCN7	ENSG00000103249.17	33.966	69.005	-1.002	1.77e-73
ZC3H12A	ENSG00000163874.8	15.02	31.074	-1.002	3.14e-35
RNF180	ENSG00000164197.11	0.69	2.385	-1.002	6.19e-140
UBE2G2	ENSG00000184787.18	25.96	52.98	-1.002	4.35e-91
FAM109A	ENSG00000198324.13	5.425	11.87	-1.002	1.67e-87
RP11-690I21.1	ENSG00000237641.1	0.44	1.885	-1.002	4.38e-78
AC093642.3	ENSG00000237940.3	0.365	1.735	-1.003	4.1e-52
AC130469.1	ENSG00000279396.1	0.12	1.245	-1.003	5.49e-153
NR5A2	ENSG00000116833.13	0.425	1.855	-1.003	9.19e-125
IFI44	ENSG00000137965.10	19.52	40.12	-1.003	1.59e-37
RNF145	ENSG00000145860.11	52.019	105.287	-1.003	3.94e-73
PKMP3	ENSG00000220563.1	0.23	1.465	-1.003	3.43e-146
RP11-54A4.2	ENSG00000237781.3	0.065	1.135	-1.003	1.99e-152
RP11-161M6.2	ENSG00000260807.6	0.43	1.865	-1.003	7.07e-58
RP11-400F19.18	ENSG00000267632.1	0.18	1.365	-1.003	3.71e-167
RP11-136C24.3	ENSG00000273291.5	0.075	1.155	-1.003	2.08e-109
RP11-227G15.10	ENSG00000274341.1	0.3	1.605	-1.003	3.26e-81
NID2	ENSG00000087303.16	5.735	12.51	-1.004	2.88e-39
KIF27	ENSG00000165115.14	1.475	3.965	-1.004	6.54e-107
OTUD1	ENSG00000165312.6	7.215	15.48	-1.004	1.42e-74
PIK3CD	ENSG00000171608.15	5.67	12.38	-1.004	6.74e-72
GPR173	ENSG00000184194.5	0.63	2.27	-1.004	8.52e-61
LINC00622	ENSG00000260941.1	0.67	2.35	-1.004	2.24e-81
RP4-681N20.5	ENSG00000275582.1	0.675	2.36	-1.004	2.02e-70
CORO1A	ENSG00000102879.15	32.42	66.07	-1.005	9.69e-45
ZNF385D	ENSG00000151789.9	0.48	1.97	-1.005	1.25e-71
SKI	ENSG00000157933.9	18.33	37.8	-1.005	2.89e-69
CCR2	ENSG00000121807.5	1.355	3.73	-1.006	2.1e-46
EIF1B	ENSG00000114784.3	38.775	78.855	-1.006	7.65e-99
NDRG4	ENSG00000103034.14	14.955	31.044	-1.006	1.56e-13
HNMT	ENSG00000150540.13	18.16	37.475	-1.006	7.21e-53
FUK	ENSG00000157353.16	6.505	14.075	-1.006	7.79e-80
PIDD1	ENSG00000177595.17	7.54	16.15	-1.006	7.9e-36
RP11-2E11.9	ENSG00000270953.1	0.785	2.585	-1.006	1.01e-88
CELF2-AS1	ENSG00000181800.5	0.05	1.11	-1.007	1.01e-130
CHN1	ENSG00000128656.13	9.735	20.569	-1.007	1.14e-56
ST3GAL6	ENSG00000064225.12	3.73	8.505	-1.007	9.6e-64
MYO15A	ENSG00000091536.16	0.62	2.255	-1.007	1.52e-101
SRGAP2C	ENSG00000171943.11	3.1	7.24	-1.007	1.25e-109
GPC5	ENSG00000179399.13	0.09	1.19	-1.007	1.19e-45
ZBTB40	ENSG00000184677.16	3.9	8.85	-1.007	6.64e-94
DACT1	ENSG00000165617.14	2.63	6.3	-1.008	9.49e-37
PTBP2	ENSG00000117569.18	5.56	12.195	-1.008	4.57e-57
JAK1	ENSG00000162434.11	33.845	69.065	-1.008	1.47e-88
SLN	ENSG00000170290.3	0.27	1.555	-1.008	1.03e-66
SH2B1	ENSG00000178188.14	20.569	42.379	-1.008	3.58e-59
VN1R83P	ENSG00000268521.1	0.38	1.775	-1.008	4.11e-95
IRF7	ENSG00000185507.19	17.33	35.895	-1.009	8.04e-42
DCUN1D3	ENSG00000188215.9	3.5	8.065	-1.01	2.46e-112
TMEM140	ENSG00000146859.6	13.98	29.17	-1.01	3.77e-97
SYNDIG1L	ENSG00000183379.8	0.08	1.175	-1.01	1.35e-115
RANBP17	ENSG00000204764.12	1.88	4.8	-1.01	6.87e-76
INAFM2	ENSG00000259330.1	6.025	13.145	-1.01	4.5e-93
PARP3	ENSG00000041880.14	9.625	20.415	-1.011	4.15e-84
SDR39U1	ENSG00000100445.16	36.151	73.845	-1.011	4.75e-60
PHOSPHO1	ENSG00000173868.11	0.32	1.66	-1.011	3.11e-79
ZBTB4	ENSG00000174282.11	15.945	33.145	-1.011	3.78e-99
GTF2IRD2B	ENSG00000174428.16	10	21.165	-1.011	4.15e-77
RP11-710F7.2	ENSG00000250740.1	0	1.015	-1.011	1.14e-129
RP3-449M8.9	ENSG00000270000.1	0.35	1.72	-1.011	2.01e-106
RP11-609D21.3	ENSG00000279296.1	0.63	2.285	-1.011	5.72e-56
FAM107B	ENSG00000065809.13	18.97	39.265	-1.012	8.62e-61
HAGHL	ENSG00000103253.17	4.59	10.275	-1.012	2.59e-36
FOXJ1	ENSG00000129654.7	1.015	3.065	-1.012	5.58e-19
SEC14L4	ENSG00000133488.14	0.81	2.65	-1.012	9.25e-43
ZNF19	ENSG00000157429.15	1.47	3.98	-1.012	7.78e-114
ZFAND2B	ENSG00000158552.12	21.995	45.384	-1.012	3.46e-84
PIGG	ENSG00000174227.15	19.03	39.4	-1.012	8.41e-73
AMIGO2	ENSG00000139211.6	7.295	15.745	-1.013	5.43e-25
DXO	ENSG00000204348.9	11.63	24.485	-1.013	3.61e-66
XX-FW83563B9.5	ENSG00000280195.1	0.92	2.875	-1.013	2.87e-91
IRAK2	ENSG00000134070.4	2.435	5.935	-1.014	1.6e-56
RN7SL381P	ENSG00000263968.2	0.26	1.545	-1.014	2.63e-64
RP11-158H5.2	ENSG00000279989.1	0.325	1.675	-1.014	3.06e-108
NPHP4	ENSG00000131697.17	3.715	8.53	-1.015	1.41e-91
PELO	ENSG00000152684.10	9.57	20.36	-1.015	5.91e-114
[truncated: 3,946 more rows]
